# Supplementary material for: Comprehensive RNA-Seq Expression Analysis of Sensory Ganglia with a Focus on Ion Channels and GPCRs in Trigeminal Ganglia
Source: PLoS One. 2013 Nov 8;8(11):e79523. doi: 10.1371/journal.pone.0079523 (PMC3832644; doi:10.1371/journal.pone.0079523)
Supplement: Figure S6 — Expression profile for the Htr family. (XLSX) [file pone.0079523.s006.xlsx]

## Sheet: Tabelle1
Expression Profile of Serotonin Receptors
Gene	Family	Symbol	L	SM	B	OE	TG	DRG	Exp	Ligand
5-Hydroxytryptamine Receptor 1A	Rhodopsin A	Htr1a	0	0	2.90624	0	1.87816	2.23528	+	Serotonin
5-Hydroxytryptamine Receptor 1B	Rhodopsin A	Htr1b	0	0	1.4558	7.36611	9.47702	5.7902	+	Serotonin
5-Hydroxytryptamine Receptor 1D	Rhodopsin A	Htr1d	0	0	0.59044	0.178919	22.2155	13.1456	+	Serotonin
5-Hydroxytryptamine Receptor 1F	Rhodopsin A	Htr1f	0	0	0.330452	0	2.99115	4.51	+	Serotonin
5-Hydroxytryptamine Receptor 2A	Rhodopsin A	Htr2a	0	0.114342	2.93264	0.05379	1.60197	3.1175	+	Serotonin
5-Hydroxytryptamine Receptor 2B	Rhodopsin A	Htr2b	0.113658	0.137978	0	1.89142	0.415465	0.210615	+	Serotonin
5-Hydroxytryptamine Receptor 2C	Rhodopsin A	Htr2c	0	0.0109566	5.61086	0.110551	0.201849	0.326052	+	Serotonin
5-Hydroxytryptamine Receptor 4	Rhodopsin A	Htr4	0	0	0.31317	0	2.96819	6.17537	-	Serotonin
5-Hydroxytryptamine Receptor 5A	Rhodopsin A	Htr5a	0	0	2.18381	0.00775095	0.960092	0.898176	-	Serotonin
5-Hydroxytryptamine Receptor 5B	Rhodopsin A	Htr5b	0.0283528	0	1.93168	0.0929903	1.90101	4.25934	-	Serotonin
5-Hydroxytryptamine Receptor 6	Rhodopsin A	Htr6	0	0	1.89451	0.144152	0.07939	0.448111	+	Serotonin
5-Hydroxytryptamine Receptor 7	Rhodopsin A	Htr7	0	0.173045	3.27699	0	6.70011	4.75806	+	Serotonin
														> 0	> 0.1	> 1	> 3	> 10	> 30	> 100	> 300	> 1000
												FPKM
