# Supplementary material for: Comprehensive RNA-Seq Expression Analysis of Sensory Ganglia with a Focus on Ion Channels and GPCRs in Trigeminal Ganglia
Source: PLoS One. 2013 Nov 8;8(11):e79523. doi: 10.1371/journal.pone.0079523 (PMC3832644; doi:10.1371/journal.pone.0079523)
Supplement: Table S1 — Table with the expression pattern for all analyzed ~23000 genes. (XLSX) [file pone.0079523.s014.xlsx]

## Sheet: Tabelle1
Gene	Liver	Skeletal Muscle	Brain	mfOE	TG	DRG
Sept1	0.903218	3.40776	1.8882	1.71992	0.932344	1.50649
Sept2	21.1324	20.6165	10.3822	47.1328	36.6382	58.4559
Sept3	0.0195748	0.17659	84.7878	57.95	42.4224	39.5806
Sept4	4.79048	8.40209	147.255	3.38879	32.1258	17.3348
Sept5	0.683203	3.43633	388.052	56.4231	132.339	140.813
Sept6	0.241196	1.03097	13.2854	4.48186	20.0646	29.4164
Sept7	15.8514	29.6027	42.7905	32.9016	83.9377	101.05
Sept8	1.01868	3.71451	46.5311	18.5955	35.6076	47.0674
Sept9	27.0119	7.01804	24.8255	27.8591	33.5317	35.1291
Sept10	5.41435	3.05777	1.8644	10.9348	7.10956	10.1666
Sept11	2.22108	9.71196	11.2822	23.7754	38.1534	44.7549
Sept12	0	0	0	0	0	0
Sept14	0	0	0	0	0.0981382	0.0558591
Sept15	125.659	104.945	118.277	103.282	102.145	100.154
100043387	0	0	0.0328124	0	0	0
100043387	0	0	0.0327602	0	0	0
0610007C21Rik	123.498	75.7067	72.0499	56.8026	33.2134	44.9332
0610007L01Rik	28.6649	18.1712	18.7162	26.4881	23.7292	22.5774
0610007P08Rik	2.27492	3.73351	1.7949	7.87242	3.39618	4.31076
0610007P14Rik	43.2351	3.56459	34.7153	23.7469	15.3251	23.7007
0610007P22Rik	15.5011	19.7346	20.5845	11.3673	15.7058	17.3826
0610008F07Rik	11.48	0	0.318198	0.1489	0	0
0610009B22Rik	29.5029	49.2416	25.3868	24.6957	21.0383	25.9206
0610009D07Rik	29.0382	28.4803	28.9117	34.8184	20.4846	24.5644
0610009O20Rik	15.1117	47.2558	28.0953	16.4228	14.5605	12.2522
0610010B08Rik	0	0	0	0	0	0
0610010B08Rik	0	0	0	0	0	0
0610010B08Rik	0	0	0	0	0	0
0610010B08Rik	0	0	0	0	0	0
0610010F05Rik	3.63018	3.42977	2.92094	9.55462	26.383	22.5692
0610010K14Rik	4.75367	7.96977	9.45986	7.11562	3.08919	6.51097
0610010O12Rik	6.44287	208.896	110.682	81.5411	50.0548	67.4111
0610011F06Rik	228.055	50.7093	53.8693	24.9506	15.355	18.0696
0610011L14Rik	8.40525	12.4764	19.2179	10.1445	10.5098	9.49181
0610012G03Rik	23.1411	60.7056	50.7186	14.9086	11.7512	18.7223
0610012H03Rik	9.38576	0	0.25758	0	0.279139	0.30837
0610030E20Rik	4.99491	2.62668	2.32647	6.31143	3.81765	3.3984
0610031J06Rik	56.0981	19.8083	42.31	41.8939	23.5725	30.6582
0610037L13Rik	13.7972	18.7573	16.6625	9.64247	15.1481	18.4568
0610037P05Rik	8.72508	42.6298	22.2965	17.248	14.1882	24.9283
0610038B21Rik	0.129514	5.07498	1.92548	0.430896	0.207975	0.341877
0610039K10Rik	7.53257	13.0728	17.2544	10.5947	7.91174	17.6644
0610040B10Rik	2.62791	4.42565	2.49651	2.45883	1.20133	0
0610040J01Rik	20.6492	3.30768	3.13749	3.93064	7.90418	2.43864
0910001L09Rik	83.1388	90.3084	69.7052	27.3869	30.3916	49.0743
1100001G20Rik	1094.11	15.4554	29.7467	0	1.81801	6.1114
1110001A16Rik	9.04195	18.847	12.4556	6.21112	4.97741	5.35373
1110001J03Rik	112.137	271.853	164.63	35.1172	31.0899	32.5006
1110002B05Rik	36.7615	25.6326	16.9433	47.5764	23.2177	45.6028
1110002L01Rik	0.778595	3.92841	12.7559	11.4485	28.6055	18.3911
1110002N22Rik	8.99532	17.5685	6.32132	4.32796	4.03933	1.93631
1110003E01Rik	35.2351	16.7955	46.6275	44.0827	49.1328	66.154
1110004E09Rik	15.0166	34.8811	28.4056	33.3754	10.3468	9.25566
1110004F10Rik	34.4245	55.6506	62.6974	44.3404	41.2813	56.1985
1110005A03Rik	26.6748	75.922	39.0181	11.2218	5.59861	7.59215
1110006O24Rik	0.563261	0.22509	1.03954	4.1331	1.04226	0.473501
1110007A13Rik	7.98175	4.45473	6.73766	17.9245	7.04304	10.1051
1110007C09Rik	14.4747	137.498	46.6875	18.28	60.5611	52.607
1110008F13Rik	103.178	49.3692	43.559	15.5178	12.4265	13.8118
1110008J03Rik	2.07592	5.41902	16.5811	4.74228	4.5516	4.46963
1110008L16Rik	5.68745	5.18635	3.59307	3.74847	3.82174	2.64152
1110008P14Rik	37.1496	53.387	213.258	38.1671	119.744	109.852
1110012D08Rik	11.4856	2.56168	5.14655	4.10577	3.65447	4.99558
1110012J17Rik	0.106041	0.405942	16.6781	34.3075	21.8383	21.1856
1110012L19Rik	12.1342	23.4071	10.5996	10.068	10.9732	13.5304
1110014N23Rik	10.1535	10.9792	37.4398	16.8983	20.7745	24.2589
1110017D15Rik	0	0	2.67021	11.3866	0.44841	0.091214
1110017F19Rik	1.43821	0.354185	0.271325	1.38315	0.236548	0.504282
1110018G07Rik	8.08137	6.70838	14.3106	39.9986	26.0688	24.2758
1110018J18Rik	32.2314	23.2255	11.4232	18.5336	12.2334	10.0398
1110020A21Rik	1.35586	4.04586	1.97451	5.93725	0.304731	0.943946
1110020G09Rik	53.2295	13.8483	9.55471	38.1822	5.50004	6.07886
1110021J02Rik	6.17694	4.47617	14.0455	14.8216	9.82548	12.3323
1110021L09Rik	0.8194	1.50185	5.68405	14.5004	3.72825	5.11087
1110028C15Rik	1.72019	4.72955	1.71956	6.37622	7.76596	5.16954
1110031I02Rik	10.8977	12.069	10.1298	14.5354	10.1453	8.64053
1110032A03Rik	11.6831	10.1779	13.5061	21.4159	8.90184	9.9064
1110032A04Rik	0.0939767	0.114231	1.9988	0.202761	4.13491	1.76351
1110032F04Rik	0	0.0535841	3.64345	0.39767	23.874	18.6207
1110034A24Rik	2.24878	1.87355	2.59759	3.49979	1.50621	1.13608
1110034B05Rik	2.39447	2.00182	1.33799	2.4108	5.0483	3.83776
1110034G24Rik	4.4645	4.69059	5.58959	3.68339	4.4579	4.32902
1110037F02Rik	3.51429	2.27404	3.21518	12.5259	9.09202	9.67033
1110038B12Rik	50.4255	39.0211	21.4179	8.19555	13.7964	19.2348
1110038D17Rik	62.0528	51.8987	18.4382	8.73949	10.1457	11.8539
1110038F14Rik	6.6617	16.9125	15.4447	16.1606	9.76056	6.80275
1110049F12Rik	19.2334	29.3718	67.1762	21.9897	33.5391	26.4023
1110051M20Rik	1.18697	10.5203	48.6906	18.387	33.6889	32.4406
1110054O05Rik	1.08792	1.065	3.52624	4.31703	3.42022	4.09201
1110057K04Rik	20.2111	4.88139	17.7357	15.6037	18.1416	19.0753
1110058L19Rik	25.7248	39.01	26.0758	21.0296	17.1749	18.644
1110059E24Rik	11.7609	5.71264	5.41633	13.0118	9.34469	13.6311
1110059G10Rik	1.62273	2.17609	2.18132	1.57361	1.87702	1.86482
1110059M19Rik	0	0.290343	1.3295	0	0.203455	0.930428
1110065P20Rik	24.2818	32.7806	66.8423	10.8345	14.7149	13.6237
1110067D22Rik	3.53024	33.714	15.6599	17.3185	11.6527	14.2939
1190002H23Rik	0.259538	64.8878	24.1442	11.8843	29.9031	31.3637
1190002N15Rik	11.4638	1.36134	9.21341	19.4104	18.1012	12.1405
1190003J15Rik	347.86	0.319131	7.31273	10.9951	0.535431	0
1190003K10Rik	0	0.85943	0	0	0	0
1190005F20Rik	5.86078	6.58351	7.55724	12.9849	11.4488	12.5832
1190005I06Rik	16.8247	2.62576	10.7137	2.96415	1.53284	4.4814
1190007F08Rik	6.47632	4.85257	12.9136	10.4802	10.5053	11.7537
1190007I07Rik	14.8938	29.6044	17.398	1.75848	1.66434	2.36051
1200009I06Rik	0.336045	1.55462	1.61256	2.13959	0.486047	0.412696
1200011I18Rik	3.61911	2.71937	4.67597	6.5175	6.58359	6.62175
1200011M11Rik	4.11968	3.80305	5.07816	4.69698	6.77303	6.84251
1200014J11Rik	2.2938	1.5313	1.96554	9.72006	6.20158	5.72128
1200016B10Rik	3.32404	1.11471	0.685015	7.12064	2.92078	4.35469
1300001I01Rik	61.5459	32.949	35.3452	27.2362	25.0277	26.428
1300002K09Rik	29.3354	0	0.69194	0.0761807	0.0396809	0.0332991
1300010F03Rik	26.0689	13.5822	11.6126	13.7065	20.3413	15.0135
1300014I06Rik	38.4864	6.76851	5.68207	5.56129	7.45046	10.5904
1300017J02Rik	360.154	0.157703	8.70972	0.0380448	0.149184	0.316225
1300018I17Rik	6.52338	10.0428	20.6478	10.6815	11.158	8.75654
1300018J18Rik	22.6065	8.98176	9.34169	8.78355	10.8011	10.3198
1500001M20Rik	2.62446	6.21101	7.15388	6.92328	6.39507	5.28873
1500002O20Rik	5.29586	9.44254	19.863	8.41301	12.4277	10.8667
1500003O03Rik	178.49	61.2155	86.5975	52.7601	162.976	153.796
1500004A13Rik	0.37223	0.218792	6.38351	7.80515	2.76573	6.88192
1500009L16Rik	0	0.906432	9.13004	1.5069	1.36321	4.46261
1500010J02Rik	1.64125	3.53789	10.7048	4.87946	6.8931	7.8319
1500011B03Rik	0.605313	1.63671	71.4684	39.1298	33.561	43.2746
1500011H22Rik	4.98593	6.56967	41.8241	35.5431	25.0255	23.633
1500011K16Rik	19.309	163.895	84.7599	14.5786	21.6559	32.1139
1500012F01Rik	43.0728	34.7331	29.4999	15.8447	13.6685	7.41315
1500015A07Rik	0.309728	0.876978	1.27141	5.34135	5.53957	4.95079
1500015O10Rik	0.0647378	3.88044	15.5504	13.2169	2.05961	7.1231
1500017E21Rik	4.86555	2.52089	1.34117	3.90834	0.954272	0.178432
1500031L02Rik	2.81683	9.69372	20.5331	15.6104	15.2591	12.2381
1500032L24Rik	180.186	310.494	385.36	97.0084	175.971	184.658
1520402A15Rik	0.257778	2.92839	11.0997	11.7586	12.528	14.7716
1600002H07Rik	25.3259	0.967513	3.60695	2.7577	2.91694	2.95136
1600002K03Rik	10.7923	16.4379	10.7578	10.1357	4.97752	6.23951
1600012F09Rik	5.27977	5.28278	3.71955	6.37556	6.9767	8.88523
1600012H06Rik	10.1703	6.26221	6.84126	21.3574	10.212	10.1012
1600014C10Rik	55.0424	13.7294	13.3148	12.788	12.4871	12.835
1600014K23Rik	0	0	0	0	0	0
1600015I10Rik	0.0222261	0.0217063	0	0	0	0
1600016N20Rik	0.167507	0	0.107302	1.90917	0.21837	0.0826979
1600021P15Rik	6.34321	3.69316	11.8455	37.3363	4.64583	7.53903
1600027N09Rik	1.8387	2.5478	5.42356	6.90138	1.5915	2.5379
1600029D21Rik	0.962871	2.54626	0.756509	11.5967	0.142263	0.128903
1600029I14Rik	0	0	0.780248	2.97248	0.0964485	0.143454
1600029O15Rik	0.0743113	0.149481	0.371152	0	0.294497	0.355753
1700001C02Rik	0	0	1.84523	4.54744	0	0
1700001C19Rik	7.84966	0.0389757	0.370845	0.134136	0	0
1700001F09Rik	0	0	0	0	0	0
1700001G17Rik	0.1404	0	0	1.60731	0.116146	0.163719
1700001J03Rik	0	0.0972596	0	0.205371	0	0.195199
1700001J11Rik	0.0203685	0.0900298	0.0387918	1.33837	0.261886	0.393829
1700001K19Rik	0	0.071103	0.526356	3.3388	0.810382	0.196328
1700001K23Rik	0	0	0.381264	0.377403	0	0.624045
1700001L05Rik	1.08202	0.0277968	0.11709	1.47169	8.89636	9.81972
1700001L19Rik	0	0.0309878	3.73394	8.91475	0.864609	1.5774
1700001O22Rik	0	13.5189	6.65855	11.3904	0.910009	1.14631
1700001P01Rik	0.110982	0	0.265137	0.105288	0.325582	1.25662
1700003E16Rik	0.708601	0.0973818	12.8264	24.8265	2.32516	2.20511
1700003F12Rik	0.101178	0.116071	0.203654	0.322821	0.444346	0.563559
1700003G18Rik	0	0	0.277654	0	0	0
1700003H04Rik	0	0	0	0	0	0
1700003M02Rik	0	0.0322748	0.728812	36.4137	2.99315	4.70948
1700006A11Rik	0	0	0	0	0	0
1700006E09Rik	0	0	0	0	0	0
1700007B14Rik	0	0	0	0	0	0
1700007E06Rik	0	0	0	0	0	0
1700007G11Rik	0	0	0.300675	5.36361	0.685835	0.654198
1700007I08Rik	0	0	0.260501	0.765965	0.409512	0.556339
1700007K09Rik	0	0	0.248891	0	0.152333	0
1700007K13Rik	0	0.176634	6.42907	12.298	0.528414	0.331665
1700008A04Rik	0	0	0	0	0	0
1700008F21Rik	0	0	0	0	0.176688	0
1700008I05Rik	0	0.0271273	0	0	0	0
1700008J07Rik	0.692227	1.72233	2.62474	7.04455	1.56499	3.14819
1700008O03Rik	0.0698602	0.0847948	2.29232	0.387784	0.619682	0.713173
1700008P02Rik	0	0	0	0	0	0
1700008P20Rik	0	0	0	0.442765	0.204992	0.0956889
1700009J07Rik	0	0	0	0.822708	0.0892903	0.127943
1700009N14Rik	0.0371269	0.045603	0.0913036	3.09838e-05	0	0
1700009P17Rik	2.08673	1.32244	2.30508	64.6055	1.67594	0.723227
1700010B08Rik	0	0	0	0	0	0
1700010D01Rik	0	0	0	0.105022	0	0
1700010I14Rik	0.186254	0.0837342	0.492876	4.26946	0.361083	0.606777
1700010M22Rik	0	0	0	0	0.400157	0
1700011A15Rik	0	0	0	0	0	0
1700011E24Rik	0	0	0.32901	0.287339	0	0.283027
1700011F03Rik	0	0	0	0	0	0
1700011F14Rik	0	0	0	0	4.50367	5.52496
1700011H14Rik	0.368005	0.0432708	0	0.388211	0.048324	0
1700011I03Rik	0	0.240356	0.121256	0.307059	1.22445	0.593338
1700011L22Rik	0	0	0	0.592984	0.531259	0.588652
1700012A03Rik	0	0	0	0	0	0
1700012A16Rik	0	0.0294133	0	0.124593	0.375307	0.215957
1700012B07Rik	0	0.0672453	0	0	0	0
1700012B09Rik	0	0	0.816659	90.9301	0.576998	0
1700012B15Rik	3.86994	3.36881	6.84771	10.9416	3.7511	5.6311
1700012D14Rik	0.460372	0.711713	0.544625	7.50002	0.793512	0.627889
1700012L04Rik	0	0	0	0	0	0
1700012P22Rik	0	0	0	0.559022	0	0
1700013B16Rik	0	0	0	0	0.0138546	0
1700013D24Rik	0	0	0	0	0	0
1700013F07Rik	0	0.113008	0.228164	8.15082	0.268337	0.257123
1700013G24Rik	0	0	0	0	0	0
1700013H16Rik	0	0	0	0	0	0
1700013N18Rik	0.147081	0.144191	0.0775523	1.05799	0.289075	0.592773
1700014N06Rik	0	0	0	0.0390781	0	0
1700015E13Rik	0	0	0	1.65947	0.483531	0.169464
1700015G11Rik	0	0	0	0.174504	0	0
1700016C15Rik	0	0.88311	0.358146	1.31142	0	0
1700016D06Rik	0	0	0	0.513578	0.0516357	0
1700016H13Rik	0	0	0	0	0	0.172208
1700016K19Rik	0	0	2.92888	21.7383	0.263601	0
1700016M24Rik	0	0	0	0.011438	0	0
1700017B05Rik	3.3406	0.92541	3.50552	48.6273	2.77535	2.67336
1700017D01Rik	0	0	0	0	0	0
1700017N19Rik	0	0	0	0	0.336087	0
1700018A04Rik	0	0	0	0.0697335	0	0
1700018A14Rik	0	0	0.215423	2.2821	0.15724	0.395739
1700018B08Rik	0	0	0	0.189572	0	0
1700018B24Rik	0	0	0	0.254686	0	0
1700018C11Rik	0	0	0	0.155922	0	0
1700018F24Rik	0	0	0	0	0	0
1700018L02Rik	23.3889	8.34964	10.8841	3.71866	5.22576	5.04995
1700018L24Rik	0	0	0	2.2224	0	0
1700019A02Rik	0	0	0.24618	0.223224	0	0
1700019B03Rik	0	0	0	0.416807	0.0923033	0.123811
1700019D03Rik	0	0.922775	1.9438	3.6657	4.17881	5.40532
1700019E19Rik	5.22031	13.7214	13.7351	56.5939	5.40605	7.36335
1700019G17Rik	14.6306	0.175252	5.49282	5.76332	1.00884	0.891292
1700019L03Rik	0.152051	0.358366	0.524417	5.02067	0.731219	1.40595
1700019M22Rik	0	0	0	0	0	0
1700019N12Rik	0.0683067	0.335483	4.3551	1.02329	6.99279	6.15896
1700019N19Rik	0	0	0	0.102855	0.343223	0.358196
1700019O17Rik	0	0	0	0.0995789	0	0
1700020A23Rik	0	0	0.349842	0.519872	0.149381	0
1700020C07Rik	0	0.107333	0.202152	0.469894	0	0.159261
1700020D05Rik	0	0	0.247645	2.52421	0.365246	0.506309
1700020I14Rik	7.24602	58.0269	26.2828	51.5556	85.5661	48.2925
1700020L24Rik	0.0717085	3.21068	3.73338	1.74652	3.69432	4.10602
1700020N01Rik	0	0	0	0	0	0
1700020N18Rik	0	0.290426	0	0.195981	0.161305	0
1700020O03Rik	3.09653	5.08352	9.64653	7.91917	9.72641	11.1739
1700021C14Rik	7.0705	9.57462	3.96748	4.24434	3.79197	1.07801
1700021F05Rik	25.6401	68.6572	30.5868	8.64314	17.9657	19.1677
1700021F07Rik	0	0	0	0	0	0
1700021K19Rik	4.57949	6.32881	20.4442	12.2437	22.1427	22.1208
1700022A21Rik	0	0	0	0	0.000202028	0
1700022I11Rik	0	0	0	0.639509	0.110415	0.23067
1700022P22Rik	0	0	0	0.358886	0	0
1700023A16Rik	0	0	0	0	0.0939679	0
1700023E05Rik	0	0	0.358751	3.28782	0	0
1700023I07Rik	0	0.026073	0.000130641	0	0	0
1700024G13Rik	0	0	1.55829	11.0351	0	0
1700024P04Rik	0	0	0	0	0	0
1700024P16Rik	1.54837	0.0906926	0.278827	5.29176	0.371786	0.531158
1700025C18Rik	0	0	0	0.188934	0	0
1700025E21Rik	0.152568	0.0675174	0.0918208	0.420045	0.0533496	0
1700025F22Rik	0	0	0	0	0	0
1700025G04Rik	0.405695	12.9913	9.10936	4.16685	9.84364	7.4593
1700025K23Rik	0.873991	4.20346	6.38929	11.3961	9.10559	9.00893
1700026D08Rik	0	0.0477075	1.33149	2.93902	0.0532932	0.165652
1700026D11Rik	0	0	0	0.0609855	0	0
1700026J04Rik	0.0507155	0.0608192	0.0416962	35.6439	0.221218	0.0455154
1700026L06Rik	0.0892627	0.21136	0.417508	3.83838	0	0
1700027A23Rik	0	0.483138	0.996811	39.3387	0.563691	0.289119
1700027D21Rik	0.864123	0	0	0	0	0.141925
1700028B04Rik	0.138196	0.170497	0.61372	0	0	0.219473
1700028J19Rik	0.251404	0.0628516	0.723166	0.280595	0.449009	0.861508
1700028K03Rik	0.0141207	0.0177174	0.0778207	0.754562	0	0
1700028M03Rik	0	0	0	0	0	0
1700028P14Rik	0	0	0.599853	18.5343	0.172913	0
1700029F09Rik	3.89122	2.30644	1.31327	3.40559	1.31291	4.94758
1700029F12Rik	0	0	0	0	0	0
1700029G01Rik	0.479598	0.798782	0.673145	1.85365	0.872695	0.611227
1700029H14Rik	0	0	0	0.126594	0	0
1700029I01Rik	0.0732929	0.049897	0.104701	0.121263	0.39158	0.306793
1700029I15Rik	1.42744	0.348654	0.682916	3.20471	0.472041	0.867979
1700029J07Rik	0.134292	0.147105	0.393836	4.04182	0.47591	0.51141
1700029J11Rik	0.0920996	0	0	0.37241	0.280423	0
1700029M20Rik	0	0	0	0	0	0.0473544
1700029P11Rik	0.0561053	3.59259e-06	0	0	0	0
1700030C10Rik	0.260211	0.07851	0.227511	0.0301688	0	0
1700030F18Rik	0	0	0	0	0	0
1700030J22Rik	0.194343	0.0391307	2.41894	9.99738	2.63864	2.38779
1700030K09Rik	0.734634	2.05717	3.15503	2.62221	1.4612	2.05068
1700031F05Rik	0	0	0	0	0	0
1700031M16Rik	0	0	0	0.169256	0	0
1700034E13Rik	0	0	0	0.251619	0	0
1700034F02Rik	0.0186617	0	0.0509809	0.061507	0.147694	0.177576
1700034H14Rik	12.7589	12.9366	4.91726	6.00611	5.06639	5.09107
1700034H15Rik	0.0107328	0	0.158509	0.229431	0.130853	0.0562386
1700034I23Rik	0.0194169	0	0.0215082	0.259353	0.0848335	0.0595622
1700034J05Rik	0	0	0	0.7809	0.061559	0.0607762
1700034O15Rik	0	0	0	0	0	0
1700037C18Rik	0.295905	2.56572	4.5096	3.35675	2.60969	1.41792
1700037H04Rik	3.17002	15.654	75.1125	45.8668	72.1764	126.725
1700039E15Rik	0.127302	0	0	0	0	0
1700040I03Rik	8.10358	15.847	17.6339	11.5117	6.09731	5.4407
1700040L02Rik	2.13573	0.230114	1.39402	6.29148	0.365863	0.295682
1700041C23Rik	0	0	0	0	0	0
1700042B14Rik	0	0	0	0	0	0
1700042G07Rik	0	0	0	0	0	0
1700044K03Rik	0	0	0	0	0	0
1700045I19Rik	0.0441491	0	0.507865	0.983179	0.260141	0.0975352
1700047I17Rik2	0.58926	3.77507	5.72072	4.74584	4.67649	7.31669
1700047I17Rik2	0.58926	3.77507	5.72072	4.74584	4.67649	7.31669
1700047M11Rik	0	0	5.53798	0.168568	0.952576	0
1700048O20Rik	0.318722	0.129071	1.61626	0.447979	1.25297	0.484891
1700049E15Rik	0.0585743	0	0	0	0	0.1658
1700049G17Rik	0.210905	0.213683	0.379383	2.15095	1.14438	1.00114
1700049L16Rik	0	0	0	0.00116963	0	0
1700052I22Rik	0	0	0	0	0	0
1700052K11Rik	0.670756	2.5222	2.75159	2.93366	1.88415	0.919039
1700052N19Rik	4.46793	10.3164	11.606	7.44649	7.54836	8.35494
1700054K19Rik	0	0	0	0	0	0
1700054N08Rik	0.118466	0.336403	15.9488	2.64913	3.33001	1.80108
1700054O13Rik	0	0	0	0.525914	0	0
1700056E22Rik	1.21276	2.244	0.906996	0.210473	0.472451	0.11065
1700057G04Rik	0.0472781	0	0	0	0	0
1700057K13Rik	0	0	0	0.300824	0.0704611	0
1700058C13Rik	0	0	0	0	0	0
1700058G18Rik	0	0.203474	26.6064	3.14769	10.1817	15.982
1700060C20Rik	0	0	0	0	0	0
1700061G19Rik	0.0202448	0	0.137928	0.112501	0.109463	0.234366
1700061J05Rik	0	0	0	20.9525	0	0
1700065D16Rik	0.016618	0	0.0396272	0.111253	0	0
1700065I17Rik	0	0	0	0	0	0
1700066B19Rik	0.0196699	0.0234066	0	0.289258	0.0551613	0
1700066M21Rik	8.22576	1.2448	1.48848	2.95099	11.3425	13.9288
1700066O22Rik	0	0	0	1.0876	0.0767354	0
1700067K01Rik	1.43367	0.415521	0.258585	2.6132	0.231393	0
1700067P10Rik	0	0	0	0.0627315	0	0
1700069L16Rik	0	0	0	0	0	0
1700071K01Rik	0.182598	0.0756193	0.144985	0.14057	0.153681	0.198698
1700072E05Rik	0	0	0	0	0	0
1700073E17Rik	0.0487887	0.0241238	0	0.150224	0	0
1700074P13Rik	0	0	0	0	0	0
1700080E11Rik	0	0	0	0	0	0
1700080O16Rik	0	0	0	0	0	0
1700081L11Rik	4.32413	3.8073	10.7734	23.1521	18.4076	18.7503
1700084C01Rik	0	0	9.47614	6.21457	1.3683	0.494676
1700084E18Rik	0.370925	1.30422	2.1043	4.42718	0.303621	0.493219
1700084J12Rik	0.493695	0.763991	0.228497	0.980458	0.359435	0.0482887
1700086L19Rik	0	0.0823943	4.98151	15.6667	15.7852	8.72263
1700086O06Rik	1.28062	0.447042	3.5767	2.41816	0.575139	1.63314
1700088E04Rik	2.08917	3.10966	9.68284	21.6217	10.2667	6.48513
1700090G07Rik	0	0	0	0	0	0
1700092M07Rik	0.259703	0.31267	0	1.35413	0	0
1700093K21Rik	0	0	0	0.366208	0	0
1700094C09Rik	0	0	0	0	0	0
1700094D03Rik	0.562162	0.723203	0.987154	6.39712	0.744496	0.771783
1700096J18Rik	0	0.402158	0	0.140011	0	0
1700096K18Rik	0.546704	2.04027	2.07763	5.29688	1.40661	1.63824
1700101E01Rik	0.179327	0	0.661293	12.5543	0.23463	0
1700102P08Rik	0	0.052348	0.212139	0.72589	0.239162	0.645894
1700106J16Rik	0	0	0	0	0.0758137	0
1700106N22Rik	0.821979	0.676297	5.20522	4.3348	4.40431	6.22401
1700108F19Rik	0.060335	0	0	0.315808	0	0
1700108J01Rik	0	0	0.395017	1.49016	0	0
1700108M19Rik	0	0	0.226059	0	0	0
1700109F18Rik	0	2.67732	0.472618	0	0	0.521827
1700109G14Rik	0	0	0	0	0	0.172226
1700109H08Rik	0.139866	0.365027	0	2.35771	0.104431	0.50059
1700110M21Rik	0	0	0.065415	0	0	0
1700111N16Rik	0	0	0	0	0	0
1700112E06Rik	0.181998	0.510304	0.137844	2.17878	1.68674	2.18827
1700113H08Rik	0	0.804637	0.0965255	0	0.689209	0
1700113I22Rik	0.11398	37.8327	12.881	1.14018	0.0557577	0.610954
1700120K04Rik	0.688925	0.325397	0	4.14701	0.63971	2.40066
1700121N20Rik	0	0	0	0	0	0
1700123I01Rik	0.0324428	0.039922	0.0781294	0.386722	0.045189	0
1700123K08Rik	0	0	0	0	0	0
1700123L14Rik	0.000145979	0.125217	0	0.0233158	0.145472	0
1700123O20Rik	13.6073	6.42098	11.9588	23.231	11.4479	11.3276
1700125D06Rik	0	0	0.884551	0	0.225824	0
1700125H20Rik	0	0	0	0	0	0
1700128F08Rik	0.162526	0.0688832	0.000589158	0.0056955	0.0744606	0.135458
1700129C05Rik	0	0	0	0	0	0
1810006K21Rik	184.781	191.02	153.152	134.572	106.826	124.466
1810008A18Rik	14.9238	6.64378	20.9369	11.212	9.44426	11.4855
1810009A15Rik	26.1761	26.147	30.3376	19.4498	12.9781	11.7268
1810009J06Rik	0.0648196	0	0	0	0	0
1810010D01Rik	0.0776604	0	0	0.144702	0	0
1810010H24Rik	2.30486	1.18285	3.27505	9.39794	1.9546	1.22343
1810011H11Rik	0.439013	0.243265	0.319803	0.403892	0.273664	0.603484
1810011O10Rik	12.6214	15.1058	4.81928	34.6363	17.0508	7.97797
1810012P15Rik	0.760096	2.46164	5.2377	8.27688	7.01489	9.30209
1810013D10Rik	28.8601	84.4926	43.3242	26.7459	21.6929	32.2838
1810013L24Rik	6.89713	9.23794	7.53466	24.4618	30.2926	32.3243
1810014B01Rik	1.35975	15.0355	4.92841	2.55407	0.685858	1.34673
1810014F10Rik	49.0725	44.1049	52.1941	16.2448	15.8719	14.9526
1810019J16Rik	3.97707	0.444316	0.288992	7.44641	0.139693	0.0456929
1810020D17Rik	36.7554	162.064	80.1492	26.3883	22.2367	23.028
1810022C23Rik	0.606152	0.770982	0.17516	2.181	0.301126	0.18295
1810022K09Rik	83.5607	108.019	61.8778	53.2179	42.1912	51.2851
1810024B03Rik	0.479431	0.520419	0.100782	0.911186	0.117254	0.124715
1810026B05Rik	0.860724	1.65127	1.67892	7.54546	2.41389	0.761602
1810026J23Rik	15.7677	26.586	26.5102	21.8587	15.8219	17.3269
1810027O10Rik	203.399	179.991	144.764	45.7034	61.6666	56.9271
1810029B16Rik	4.47297	10.5629	6.02088	3.90578	3.60079	3.50052
1810030J14Rik	0.0705924	0	0	0	0	0
1810030N24Rik	13.2249	20.4158	13.6815	9.75693	10.4399	6.19761
1810030O07Rik	2.4772	4.88209	4.46225	7.61618	7.31459	9.36026
1810031K17Rik	24.4317	10.2917	11.8758	61.093	19.443	20.3537
1810032O08Rik	1.29779	5.26188	3.88073	9.72349	1.13578	1.59079
1810033B17Rik	0.0423328	1.05034	0.204741	1.11449	0.340026	0.594412
1810035L17Rik	113.048	205.225	113.8	52.8987	87.0779	59.5377
1810037I17Rik	14.6256	27.8885	48.9109	46.1073	29.5162	58.1149
1810041L15Rik	0.0490306	0.0982475	12.485	22.8382	21.4519	21.3905
1810043G02Rik	3.63933	5.03235	21.3045	16.9083	12.8351	15.0711
1810043H04Rik	77.8906	92.3463	89.2704	34.3937	25.6796	31.3417
1810046J19Rik	76.23	54.4913	109.714	65.3612	70.6113	86.9203
1810046K07Rik	0.832953	0.0504223	0.0961731	2.74264	0	0.0765947
1810048J11Rik	1.23272	1.87714	5.47733	19.7334	6.83396	7.41426
1810049H13Rik	16.2718	24.1509	15.9293	6.02297	4.16316	4.65101
1810055G02Rik	17.8355	5.15012	12.0905	26.8939	6.02954	9.38563
1810058I24Rik	66.7594	84.3135	45.2762	21.6491	46.5638	73.0151
1810062O18Rik	0.247556	0.204414	0	1.19707	0.22708	0
1810063B05Rik	30.6257	28.9868	25.4371	10.631	8.131	13.9794
1810063B07Rik	6.41127	5.29842	5.99364	5.33536	2.19553	3.72766
1810064F22Rik	0.238806	0.0251799	0	0.584716	0.128578	0.169766
1810065E05Rik	0	0	0	0	0	0
1810074P20Rik	9.00531	6.95754	4.74009	18.5545	7.69546	8.79441
2010000I03Rik	0.20784	0.138262	0.342202	1.60595	0.321052	0.220578
2010001E11Rik	0.649137	0.235121	0.325049	0.301361	0.202545	0.160928
2010001M06Rik	3.09657	4.10788	11.1836	1.16835	1.75529	1.64624
2010001M09Rik	0.421525	1.35004	0.642231	1.34102	0.192151	0.136091
2010002M12Rik	0.0650831	0.0298086	0.0143162	0.76822	0.206573	0.945472
2010002N04Rik	0.594212	0.983408	4.96133	3.6086	2.1024	2.99827
2010003K11Rik	12.3238	1.15313	0.557115	0	0	0
2010003K15Rik	26.8817	0	0.820277	0.0746005	0	0
2010005H15Rik	0	0.0332947	0	0.235839	0	0.136431
2010007H12Rik	12.3093	9.15846	20.8617	5.39037	6.15679	6.02028
2010011I20Rik	30.9414	4.15341	10.0058	29.9386	5.69995	6.2516
2010012O05Rik	3.15439	5.91625	6.50389	9.22447	8.70327	8.06054
2010015L04Rik	0.0388612	0.154486	2.45652	14.4681	0.96078	0.704959
2010016I18Rik	0.037513	0.131448	0.0864691	0.993782	0.111265	0
2010106E10Rik	0.0354377	0	0	0	0	0
2010106G01Rik	36.0227	12.0741	7.2179	14.9262	8.84632	9.58032
2010107E04Rik	662.24	1863.09	979.521	266.336	447.338	379.249
2010107G12Rik	0.0248291	0	0	0.228621	0.141297	0.101331
2010107G23Rik	0.711902	0.98287	18.598	7.53199	7.1196	10.6746
2010107H07Rik	61.4109	56.1922	42.1081	40.3019	12.1847	11.7356
2010109I03Rik	0	0.145123	0.171703	0	0	0
2010109K11Rik	1.37638	2.5499	2.79003	4.52006	4.61426	4.10527
2010110P09Rik	1.50063	2.14788	1.18659	1.05936	22.9442	14.2123
2010111I01Rik	1.95465	4.34635	4.16062	14.4544	8.44828	12.3754
2010204K13Rik	0.207092	0.33611	8.11876	5.36544	0.214604	0
2010300C02Rik	0.0985528	0.179854	37.6274	11.2138	2.40468	0.939918
2010305A19Rik	5.96466	7.08384	4.6085	1.80039	2.81461	3.70919
2010317E24Rik	0	0.100145	0.444252	0.598622	0.0480005	0.0935049
2010320M18Rik	6.60354	14.3961	10.0443	12.8173	3.67244	7.01217
2010321M09Rik	3.97829	10.3746	9.79971	13.7005	7.07199	6.47193
2200001I15Rik	79.4238	16.2082	5.26946	1.3176	0	1.34467
2200002D01Rik	24.1214	3.63815	3.68433	5.97382	1.32795	2.07318
2200002J24Rik	0.105465	0.127582	0	0	0	0
2200002K05Rik	0.0478002	0.0571581	4.54339	0.159538	18.7352	35.3834
2210009G21Rik	0.845095	1.99519	1.27953	8.75089	3.05467	2.75389
2210010C04Rik	167.771	3.31244	4.04503	0	0.0348041	0
2210010C17Rik	0.38955	0.0663538	0	0.242868	0	0
2210012G02Rik	2.01733	2.50609	2.93438	3.19745	4.53963	3.77028
2210013O21Rik	1.90861	13.5534	29.2044	8.69011	35.923	20.5096
2210015D19Rik	4.65855	16.8438	9.56905	4.63956	8.2873	8.60426
2210016F16Rik	14.4005	7.27279	6.0589	6.24062	3.95499	4.88362
2210016L21Rik	7.15454	13.9806	92.4518	21.5331	36.7824	27.4066
2210018M11Rik	1.33657	1.61995	4.96423	15.3773	8.16556	7.47773
2210020M01Rik	0.134175	1.03009	1.79755	6.81934	0.888073	3.40482
2210021J22Rik	5.94618	37.1168	16.7606	11.7804	6.43514	7.21428
2210403K04Rik	8.71216	11.3745	8.18177	7.41014	6.11901	7.38873
2210404J11Rik	5.39022	4.25878	4.26839	11.3468	5.22245	7.62502
2210404O07Rik	0.819831	0.4277	0.531315	2.14355	0.153133	1.81249
2210407C18Rik	0.109763	0	0	1.21896	0.255129	0.20747
2210408I21Rik	0.365401	0.546091	0.550875	10.9818	4.35247	2.22129
2210409E12Rik	0	0.318764	0.468452	0.426887	0	0
2210411K11Rik	27.2421	7.20194	9.64695	11.7725	1.27514	1.67442
2210415F13Rik	0.0982236	0	0	0.0430623	0.563518	0
2210417A02Rik	0.839103	0	0	0.233916	0	0
2300002M23Rik	0	3.2827	0.950183	0	0	0
2300003K06Rik	0	0	0	0	0	0
2300005B03Rik	0	0.455835	0	3.96369	4.44256	3.28072
2300009A05Rik	27.4668	37.7254	33.3039	10.2154	7.76959	4.96452
2310001A20Rik	22.6475	15.1111	26.9073	42.082	28.2712	28.2246
2310001K24Rik	3.45486	5.69415	3.1884	0	0.756627	11.4752
2310002J15Rik	0	0.539711	0.614521	0	0.126636	0
2310002L09Rik	0	124.456	35.0051	0.0483345	0	0.223063
2310003C23Rik	14.9275	19.7298	22.6226	23.2909	17.1996	25.3842
2310003F16Rik	146.615	117.48	105.018	74.1248	82.452	93.638
2310003H01Rik	3.33836	8.39018	8.34241	4.72344	4.84101	6.68968
2310003L22Rik	1.88616	26.0456	14.9917	6.58342	11.4914	9.62982
2310004I24Rik	15.9464	4.13346	5.96912	8.042	7.52557	9.90851
2310004N24Rik	2.32313	18.1384	38.0455	16.4768	20.8574	20.4636
2310005G13Rik	0	0.0689308	0.0394196	0.0156465	0.0697983	0.0749015
2310007A19Rik	0.0948012	14.1341	4.67654	13.7205	0.6521	0
2310007B03Rik	0.023851	0.112998	0.106891	0.433963	0.0314971	0
2310007L24Rik	0	6.6088	3.8259	4.30788	0	0
2310008H04Rik	1.30242	0.948252	0.586899	2.48112	2.00465	4.11349
2310008H09Rik	6.9485	5.19658	4.1707	13.5017	4.5621	5.26255
2310009B15Rik	9.01509	24.3987	18.5279	5.90817	4.27621	2.35256
2310010M20Rik	0	36.4454	11.147	0.0341494	0	0.328817
2310011J03Rik	10.99	9.51746	29.302	14.572	15.9084	17.6515
2310014H01Rik	1.78872	4.05359	4.69261	4.49264	8.55231	10.3677
2310014L17Rik	0.165927	0.124718	0.283163	0.61422	0.351349	0.0670429
2310015A10Rik	0.431263	3.48951	2.79181	5.33599	3.378	3.52815
2310016C08Rik	2.91732	5.79319	6.31969	3.94333	5.21076	5.84728
2310016M24Rik	47.6654	256.748	185.632	52.3186	63.9163	54.6047
2310021H06Rik	0	0	0	0.0977965	0	0
2310021P13Rik	5.10576	5.32574	28.9276	29.7171	26.274	22.7884
2310022A10Rik	2.9627	48.8082	25.3192	6.1633	4.51987	4.60782
2310022B05Rik	7.42104	6.82487	35.4469	12.0704	30.3968	23.4724
2310028H24Rik	1.64274	12.4089	65.8518	18.931	103.034	94.8575
2310028O11Rik	20.271	65.6176	47.8383	16.9624	23.5915	24.4644
2310030G06Rik	10.4955	2.84023	1.82685	6.59947	1.35239	1.47494
2310030N02Rik	16.3451	36.1696	16.8036	4.60499	5.16633	6.11849
2310033E01Rik	0	0.536128	0	0.58144	0	0.165495
2310033P09Rik	7.2455	3.11076	15.1558	11.0417	9.56232	10.0885
2310034C09Rik	0	3.26717	1.16615	0	0	0
2310035C23Rik	2.58975	1.3727	4.87649	15.279	18.0638	15.7244
2310035K24Rik	12.5308	13.7719	17.3576	11.7362	10.4704	7.72919
2310036O22Rik	75.5139	75.8339	110.591	58.9706	63.751	41.1486
2310037I24Rik	15.3157	43.3841	28.859	23.6294	25.8817	24.5972
2310039H08Rik	75.523	38.0739	16.2201	9.5209	2.10015	2.29673
2310042D19Rik	0	36.804	10.1153	3.39518	0.545541	1.19908
2310042E22Rik	0	1.72951	0.324915	0.311409	0	0
2310043J07Rik	0	0.0700001	0	0.540363	0.080876	0
2310044G17Rik	7.13923	10.3168	19.6632	19.5812	20.2596	16.1611
2310044H10Rik	62.8358	48.1302	202.322	44.3552	86.9692	79.3874
2310045N01Rik	26.3209	19.8951	33.8384	35.7263	14.4479	24.1619
2310046A06Rik	0	30.563	14.7775	0.975102	22.509	38.0377
2310046K01Rik	0.40874	0.671491	1.37138	2.03986	1.15129	1.3306
2310046O06Rik	2.6949	5.27662	6.92651	11.8778	13.3993	15.0191
2310047B19Rik	3.05954	1.87106	8.77595	6.14251	3.39531	3.07858
2310047M10Rik	7.19444	21.5104	27.728	6.22159	16.4623	16.4695
2310050B05Rik	0	98.6096	15.8729	0.711135	0	0.906549
2310050C09Rik	0	0.376881	0	0	0	0
2310057J16Rik	3.6441	0.278349	8.71044	15.504	8.11867	7.91694
2310057J18Rik	0.0752219	0	0	109.864	0.117647	0
2310057M21Rik	1.1039	7.52204	8.12823	5.47514	8.22898	11.9003
2310057N15Rik	0	1.24607	0.698716	0	0	0
2310061C15Rik	11.454	19.7078	15.9353	4.99086	8.67842	10.6679
2310061I04Rik	29.4266	89.5408	85.6933	37.6977	60.4735	30.0359
2310061J03Rik	5.45357	2.70865	4.98146	2.34333	1.14177	0.886911
2310061N02Rik	0	0.601888	0.402181	0	0	0
2310067B10Rik	9.45387	15.3209	23.1833	90.3109	13.2822	13.0175
2310068J16Rik	0.437669	0.504914	0.720115	1.1138	0.783055	0.240334
2310079F23Rik	0.871035	0.909898	2.22864	4.10317	1.71545	2.07818
2310079G19Rik	0	0.483232	0.322782	0	0	0
2310079N02Rik	4.81306	12.5634	16.8694	11.8478	11.655	9.48623
2400001E08Rik	60.6894	129.216	127.047	41.2914	69.099	61.1228
2400003C14Rik	25.608	18.8841	34.6742	34.0228	35.3311	33.9423
2410001C21Rik	35.0041	28.002	43.9272	28.0407	37.5593	38.6222
2410002F23Rik	2.16165	4.00216	30.2243	12.3263	10.6729	10.17
2410002I01Rik	3.17412	2.71776	5.92578	5.67471	3.54006	4.24287
2410002O22Rik	7.37173	7.24541	9.17009	21.0016	21.5564	22.5899
2410003K15Rik	35.3766	106.346	37.6374	12.0536	14.4598	8.64376
2410004A20Rik	0.0341699	0	0.0725624	0.0894169	0	0.0561363
2410004B18Rik	4.81264	27.4405	27.3139	6.75665	10.6069	7.9938
2410006H16Rik	61.3537	100.774	81.4471	20.595	22.7115	26.8316
2410012M07Rik	0	0	0	0.0295708	0.00821637	0
2410015M20Rik	169.811	116.104	135.507	54.7527	34.0293	35.2138
2410016O06Rik	4.37916	2.69064	8.32317	4.84672	2.81527	2.10192
2410017I17Rik	0.000159307	8.31341e-06	0.0867558	0.556387	0.507421	1.07991
2410018L13Rik	0	0	0.633425	0.0373404	0.485353	0.668594
2410022L05Rik	6.42151	10.8597	48.5561	15.9204	25.6662	21.5268
2410042D21Rik	1.96827	1.1005	2.13647	6.82443	4.06575	3.68369
2410066E13Rik	0.506766	4.02995	20.1648	26.2302	78.1892	61.5173
2410075B13Rik	1.57385	0.368749	3.75582	3.56426	1.59259	1.01933
2410076I21Rik	0.836067	0.379263	0.720885	1.83345	1.42628	0.2429
2410089E03Rik	0.476121	0.30407	2.16232	15.9763	7.24268	5.15439
2410091C18Rik	5.70471	7.84865	9.32041	10.5582	10.2494	13.6873
2410127L17Rik	9.87693	94.889	27.2926	11.3807	7.18708	5.46097
2410131K14Rik	2.37478	3.68735	8.70406	13.9161	11.9516	9.64577
2410137F16Rik	0.173454	0.941939	0.227482	4.27343	0.289122	0.286569
2410137M14Rik	3.31291e-06	0.321995	0	0	0	0.157858
2500003M10Rik	16.2279	35.7122	41.6281	74.3458	35.0754	42.3628
2510002D24Rik	9.95963	16.0002	9.19585	9.48597	4.58978	3.89299
2510003E04Rik	7.92756	21.7037	65.9204	50.5502	43.8752	43.1323
2510006D16Rik	43.5232	59.9739	83.8289	49.4827	34.2564	37.9027
2510009E07Rik	1.57297	5.85203	11.2295	32.2537	29.5417	34.6755
2510012J08Rik	6.85521	4.97415	14.193	12.2884	6.32618	7.32583
2510039O18Rik	15.6316	14.4951	16.7783	36.0152	15.506	17.5746
2510049J12Rik	7.67047	0.123026	0.422756	0.830064	0.330267	0.170946
2610001J05Rik	9.29069	20.3762	20.1058	14.5991	15.4897	30.0073
2610002D18Rik	0	0.0916526	0.180336	0.135684	0	0
2610002I17Rik	1.68687	1.82277	4.92818	3.32278	4.43613	5.02965
2610002J02Rik	7.14402	2.44553	22.2055	9.732	19.4038	25.3572
2610002M06Rik	2.54057	1.42143	3.45603	5.01059	5.95158	6.72242
2610005L07Rik	1.02537	0.763156	2.68772	17.6941	8.62715	24.1775
2610008E11Rik	0.178989	0.453801	0.291113	3.23245	1.11065	1.48228
2610015P09Rik	0.99939	0.710436	0.622253	8.14517	1.03076	0.899685
2610017I09Rik	0.126987	0.154561	28.5123	0	0.752053	0
2610018G03Rik	0.0623642	1.28466	0.546135	5.88401	1.05335	1.34343
2610019F03Rik	5.49409	11.2319	10.4311	20.5786	11.2324	17.5813
2610020H08Rik	0.853136	0.198484	0.235934	1.88061	0.466229	0
2610021K21Rik	0	0.0793771	0.111753	3.30069	0.384613	0.34645
2610024G14Rik	7.22812	10.8685	14.1632	6.11662	8.55521	6.55157
2610027L16Rik	7.95392	7.24898	4.77224	5.03208	3.92165	4.65491
2610028E06Rik	0	0	0.0330205	0.0265461	0	0
2610028H24Rik	0	0.370987	0.0691487	2.98056	0	0
2610029G23Rik	2.48987	2.85279	4.43311	5.04217	6.36677	6.84831
2610029I01Rik	8.90901	5.84107	4.73119	1.96785	12.2008	9.51285
2610034B18Rik	2.84547	2.2779	7.87722	6.25749	9.75865	15.3514
2610034M16Rik	0	0.0109669	0.229147	0.00834125	0.888689	0.72719
2610035D17Rik	0.144069	7.87491	12.3802	1.54388	3.13753	2.83746
2610039C10Rik	1.07315	1.05392	2.19139	2.29862	2.29662	3.36275
2610044O15Rik	0.661625	2.08208	1.44536	2.20603	3.87083	1.66858
2610100L16Rik	0	0	2.27089	0	1.34631	0.268217
2610101N10Rik	3.16245	2.1045	2.35327	13.5339	8.86475	8.73117
2610109H07Rik	0	0.0317301	0.123192	0.461942	0.303479	0.355174
2610203C20Rik	0.0313918	0.514035	2.56284	4.64074	5.15998	6.60167
2610203C22Rik	1.02394	0.789933	0.514116	1.23288	0.122795	0.640666
2610204G22Rik	0.463366	1.39421	0.232062	0.965863	0.501847	0.370628
2610301B20Rik	1.79434	2.87112	5.93826	13.0172	8.90197	9.37114
2610301G19Rik	5.15079	7.25453	26.6089	24.6859	15.8034	14.3023
2610305D13Rik	0.0141074	0.153567	0.165317	0.259984	0.143903	0.196706
2610306M01Rik	1.32207	7.30029	8.79249	4.10703	4.87644	3.15242
2610318N02Rik	0	0.0467608	0.537236	0.218552	0	0
2610507B11Rik	19.643	59.9744	48.0414	86.3115	56.9055	56.3648
2610524H06Rik	0	0.253825	1.6747	1.43256	0.701656	0.634239
2610528E23Rik	4.30143	25.0082	10.7166	2.8845	2.46443	4.45579
2610528J11Rik	8.29551	0.17061	0	8.09324	0.203684	0
2700007P21Rik	1.72141	1.12941	3.11343	16.8052	7.29366	7.07456
2700023E23Rik	1.98204	0.507693	2.29926	4.22477	0.707391	0.614158
2700029M09Rik	3.68485	5.0353	18.1246	14.4373	17.3149	13.9168
2700046A07Rik	0.0439428	0.0537882	0.164252	1.28744	0.221559	0.0595529
2700046G09Rik	0.398971	0.874371	1.21134	1.6396	0.682152	0.91556
2700049A03Rik	0.442811	0.646169	0.823257	4.84518	2.6097	1.95597
2700050L05Rik	3.30015	2.06953	2.82775	8.89247	4.78823	4.34925
2700060E02Rik	58.2241	117.56	58.4293	44.0795	38.5772	57.7848
2700062C07Rik	5.79928	3.32013	7.05712	7.29456	4.41252	5.94023
2700078E11Rik	12.448	9.76105	9.88506	12.7276	19.7408	19.0742
2700078K21Rik	16.2754	53.7653	35.8291	18.3608	27.9791	23.7303
2700081O15Rik	0.682942	1.75498	10.5721	4.50117	8.38971	8.25733
2700086A05Rik	0	0.173667	0	0	0	0.152996
2700089E24Rik	27.1755	62.3373	33.5178	37.4599	35.2679	31.8923
2700094K13Rik	19.7376	25.9402	43.6901	15.7261	15.0948	16.069
2700097O09Rik	2.20101	6.11764	3.81602	4.02104	1.68914	2.55603
2700099C18Rik	0.0916154	0.0355379	0.154294	0.636379	0.270854	0.211264
2810001G20Rik	1.27197	3.45983	7.7199	9.5892	2.17668	1.27968
2810002D19Rik	1.04764	2.2436	2.04236	2.83141	0.809455	0.531345
2810002N01Rik	20.7945	49.9656	37.9348	23.1027	12.2026	15.3636
2810004N23Rik	18.0197	20.7317	12.493	5.91788	6.57636	9.43634
2810006K23Rik	2.53717	4.37172	6.25399	3.20222	3.05969	3.61695
2810007J24Rik	200.069	0.0709108	4.31047	0.0211009	0	0
2810008D09Rik	3.217	5.619	12.0699	15.8295	7.08275	3.40001
2810008M24Rik	8.24089	8.31119	5.8424	14.0556	17.4523	24.2983
2810021B07Rik	1.94335	2.7836	2.3136	5.40706	1.69719	2.07904
2810021J22Rik	0.333207	0.252826	0.795487	3.10775	1.53153	2.41674
2810025M15Rik	7.03474	9.58629	16.937	11.3935	5.77602	8.17388
2810030E01Rik	0.13367	0.0619793	1.14102	2.28937	2.82548	2.83563
2810032G03Rik	0.0799111	0.395347	3.43047	0.314109	2.8815	2.41644
2810046L04Rik	2.06954	1.45724	5.6311	13.0996	7.20962	6.63932
2810047C21Rik1	0.0294371	0	0.144085	0.160104	0.0900569	0.280755
2810055F11Rik	13.5566	2.11335	1.5937	1.77263	0.764928	1.60955
2810055G20Rik	0.0901034	0.128539	0.0381003	0.539053	1.08436	0.892895
2810403A07Rik	7.01866	6.7722	12.3715	19.0845	9.1567	11.018
2810403D21Rik	0.339393	0.596692	0	2.58134	0.270306	0.280959
2810405F15Rik	0	0	0.164465	0.435276	0.106069	0
2810405K02Rik	35.4473	305.409	241.217	273.664	59.6114	49.8644
2810407C02Rik	40.4275	42.5196	24.6644	168.424	97.9841	140.93
2810408A11Rik	0.0294973	0.207917	0.0673374	2.04512	0.197459	0.454448
2810408M09Rik	4.02211	8.97685	11.5868	6.73766	5.66298	4.96051
2810410L24Rik	0.588015	1.89124	2.24401	1.61759	0.539677	0.672965
2810417H13Rik	0.0701608	0.410664	0.0991523	1.85693	0.126644	0.196638
2810422J05Rik	43.0064	70.4371	42.5047	17.1628	15.8101	12.6817
2810422O20Rik	2.13367	3.11676	1.6353	4.03261	1.98253	1.30689
2810428I15Rik	80.4464	200.538	166.285	62.6499	61.3764	75.8944
2810429I04Rik	0	0	1.28164	0.404096	0	0
2810432D09Rik	26.6053	52.1873	41.4191	13.328	13.3244	9.32569
2810432L12Rik	0.204101	12.0447	36.9132	5.54222	31.3986	27.0464
2810433D01Rik	0	0.0885861	0.0917926	0.225121	0.109094	0.417676
2810442I21Rik	0	0	0	0.099807	0	0
2810453I06Rik	3.96429	74.3465	37.0854	9.09417	12.0176	11.5749
2810454H06Rik	0.19339	0.215338	0.233358	0.386471	0.278089	0.244837
2810459M11Rik	22.7809	0.0178763	3.18016	1.13036	0.09142	0.102192
2810474O19Rik	1.57595	0.588378	0.355967	7.86827	5.79863	3.59683
2900002K06Rik	5.93289	6.83397	4.28594	5.69855	5.4351	2.85494
2900005J15Rik	0.25247	0.0647682	0.432962	1.01825	0.797517	0.641777
2900006K08Rik	0.180521	0.626339	0.337129	4.58765	0.562568	0.767329
2900010J23Rik	151.752	152.641	188.194	79.7095	108.047	114.944
2900010M23Rik	113.888	710.114	568.604	49.8454	102.449	99.3359
2900011O08Rik	0.0968428	0	121.121	0.464618	42.4321	52.92
2900026A02Rik	15.1602	4.80482	6.14758	8.35815	10.4697	9.70197
2900041M22Rik	0	0.971284	0.453752	0.610496	1.53079	1.76175
2900052N01Rik	0	0.0196794	1.15133	0.295674	3.46683	2.15703
2900053A13Rik	19.1978	30.2836	31.407	12.8123	12.2311	15.6008
2900060B14Rik	0.423104	0.777591	0.832629	337.659	2.60505	16.4923
2900062L11Rik	0.0633458	4.3297	30.687	17.4416	15.4594	10.8484
2900064A13Rik	83.9217	74.0845	83.521	67.9062	74.8511	56.3243
2900073G15Rik	45.741	168.927	63.1141	51.5867	28.7819	42.6974
2900079G21Rik	0	0.452435	11.4754	1.82077	9.04357	3.15642
2900092C05Rik	0	0	0	0	0	0
2900092D14Rik	0	0	0.462155	0	0.230531	0
2900092E17Rik	15.1679	19.2288	53.8411	13.2012	23.2496	15.1662
2900097C17Rik	14.0929	18.3579	56.9196	52.3903	162.719	126.087
3000002C10Rik	1.50619	11.4143	6.78116	0.24637	0.173943	0.164513
3010026O09Rik	7.56737	8.43353	8.83123	5.30516	5.82629	8.27624
3110001D03Rik	37.8922	87.3087	64.835	22.2201	25.1269	23.3894
3110001I22Rik	1.21062	0.560379	0.414679	2.58976	0.870432	0.832235
3110002H16Rik	10.1355	7.22666	11.1594	13.3055	15.6233	17.2913
3110003A17Rik	12.7525	5.85567	5.4587	12.4199	6.93903	5.76948
3110007F17Rik	0.114523	0.206858	1.04312	0.881571	0.802208	1.4887
3110009E18Rik	1.44043	4.96331	4.03132	6.34337	2.49983	0.447724
3110021A11Rik	0.336466	0.095009	0.357349	1.56285	0.283716	0.182773
3110035E14Rik	0	0	18.5928	0.050527	0.349824	0.35472
3110039M20Rik	0	0	0.77173	1.87049	0	0
3110040N11Rik	10.3161	14.5674	7.58638	6.20255	5.70332	6.34821
3110043O21Rik	3.58126	6.27045	6.233	16.8867	35.211	36.479
3110047P20Rik	0.0288487	0	2.20682	0.0136755	9.58748	8.52681
3110048L19Rik	3.83902e-11	4.5092e-12	1.66996e-10	4.95073e-11	5.77826e-11	1.27191e-10
3110049J23Rik	82.6669	0.440025	2.54014	1.2041	2.15812	1.7222
3110052M02Rik	0.434066	0.307711	0.57436	1.80428	2.68082	2.85776
3110056O03Rik	4.6	9.77034	21.7433	23.1808	11.8119	11.5935
3110057O12Rik	4.08032	3.15233	1.81001	2.06954	0.953818	2.14388
3110062M04Rik	5.43292	15.522	5.93123	2.94115	2.81646	3.04044
3110070M22Rik	0.276806	0.588858	1.60623	1.8006	1.38945	1.29926
3110079O15Rik	0.188595	2.61821	0.83114	1.29512	0	0
3110082D06Rik	0	0.0599378	0.114639	0.0194379	1.17928	0.356852
3110082I17Rik	1.87357	6.10285	6.88723	4.33537	2.93269	2.5238
3110099E03Rik	0	0	0	0	0	0
3200002M19Rik	7.25225	14.3178	13.4008	7.65273	10.4556	10.5148
3230401D17Rik	19.7389	40.6878	22.7091	13.3211	14.7194	14.163
3300002I08Rik	0.198164	0.360862	0	1.74564	0.552815	1.12231
3425401B19Rik	0.00778585	47.8588	11.1454	0.196912	0.936165	1.60757
3632451O06Rik	0.0508387	1.26201	12.2245	21.2531	32.3318	26.601
3830403N18Rik	0.0247976	0.0581405	0	0.0499131	0.056259	0
3830406C13Rik	5.55049	4.11907	5.42619	8.50216	16.5496	12.7527
3830408C21Rik	0.025754	0.159065	0.323847	2.09917	1.08395	0.383904
3830417A13Rik	0	0	0	0	0	0
3830431G21Rik	0.0143019	0.0846315	6.71178	0.642316	23.2222	14.9955
3930402G23Rik	0.0495014	0	0.0801736	0.38601	0	0
4430402I18Rik	0.226658	0.712932	0.842337	9.9782	0.466894	0.623801
4632411B12Rik	9.39319	9.36395	20.3592	24.4361	22.2478	19.4569
4632415K11Rik	3.50023	2.55354	4.95244	4.94924	5.805	5.87613
4632415L05Rik	0.547954	0.777282	2.30516	3.06095	2.77617	2.05064
4632427E13Rik	0.408952	2.03507	0.448294	12.2088	2.54823	3.5866
4632428C04Rik	0.0846289	0.898262	0.679805	0.366526	3.22576	2.96978
4632428N05Rik	1.98558	4.21771	7.78223	4.22405	1.19966	3.55665
4632434I11Rik	0.175543	0.053664	0.0905955	0.239759	0.577403	0.422979
4732415M23Rik	0.675251	0.632373	2.73782	7.59281	2.76334	1.30587
4732416N19Rik	0.128009	0.29807	0.298945	1.15209	0.180455	0.29793
4732418C07Rik	3.32746	6.81241	5.61569	40.226	18.6893	18.4895
4732456N10Rik	1.18573e-05	0.0236451	0.175943	2.35398	0.000995968	0.0965857
4732471D19Rik	1.7492	0.48251	2.1144	2.3175	2.82269	3.37756
4732471J01Rik	0.17354	0.35727	1.12092	0.481463	1.17773	1.83785
4831426I19Rik	0.803907	0.519452	0.374101	4.44989	7.26335	6.99607
4831440E17Rik	0.0850521	0.29375	0.0955371	1.00291	0.104783	0.206184
4832428D23Rik	0	2.66345	0.548943	0.271267	0.103553	0.0594386
4833403I15Rik	0.0138606	1.21044	0.349364	0.376853	0.372619	0.784391
4833413D08Rik	0	0	0	130.951	0.0788207	0
4833418N02Rik	0.452505	2.05748	0.836494	2.32591	0.400708	0.418545
4833420G17Rik	6.18884	4.48983	5.18309	17.2306	8.13504	8.80296
4833422C13Rik	0.568577	0.330544	1.70487	6.67222	4.47244	3.90705
4833422F24Rik	0.421508	0.211845	0.131007	0.468631	0.0905073	0
4833423E24Rik	0	0.528058	0.410705	1.48756	0.237803	0.0769032
4833424O15Rik	0.0096402	0	5.05399	0.0374205	1.82557	0.835836
4833427G06Rik	0	0	0.499771	3.80197	0	0
4833439L19Rik	11.818	47.8012	29.8931	26.9623	23.9647	23.992
4833442J19Rik	15.0551	5.62825	2.80293	9.84744	2.37865	0.98917
4921501E09Rik	0	0.0122539	0.026945	0	0	0
4921504E06Rik	0	0	0	0	0	0.0647362
4921506M07Rik	0.405838	0	0	0.519199	0	0
4921507P07Rik	0.218562	0.989829	0.374906	0.743556	0.250695	0.188965
4921509C19Rik	0	0	0	0.0440714	0.00698395	0
4921510H08Rik	0	0	0	0	0	0
4921511C20Rik	0	0	0	0	0	0
4921511H03Rik	0	0	0	0.514542	0	0
4921513D23Rik	7.52369	2.14554	4.21163	22.1666	39.1676	39.099
4921515J06Rik	0.0247676	0	0.308262	0.783405	0.192611	0.0640248
4921517D21Rik	0	0	0	0	0	0
4921517D22Rik	0.0125691	0.0307456	0.0336423	0	0.020105	0
4921517L17Rik	0.231722	1.42425	1.90351	1.10121	1.03983	0.603355
4921521F21Rik	0.109043	1.48156	0.264819	0.0322508	0	0
4921523A10Rik	2.88652	2.50696	3.59764	1.90572	2.92184	0.922011
4921524J17Rik	5.05066	11.1674	7.45646	6.77716	5.24303	7.36223
4921524L21Rik	0	0	0	0	0	0
4921528I01Rik	0	0	0	0.0801642	0.0613035	0.125876
4921528O07Rik	0	0	0	0	0	0
4921530D09Rik	0	0.0635434	0.121403	0.289672	0.133557	0.0884908
4921530L21Rik	0	0	0	0	0	0.091624
4921531C22Rik	0.666807	1.0415	1.66376	1.25627	0.457962	0.808346
4921533I20Rik	0.0471463	0	0.00358464	0.0399767	0	0
4921536K21Rik	0	0.126096	0.253242	1.3237	0.151634	0.207871
4921539E11Rik	0	0	0	0	0	0
4922501C03Rik	0.47057	0.356725	0.517444	5.1888	1.94036	1.57807
4922501L14Rik	0	0	1.94966	31.2221	5.74329	2.87974
4922502D21Rik	0	0	0	0.0958015	0	0
4922505E12Rik	0	0	0	0	0	0.0634888
4922505G16Rik	0.0136271	0.230526	0.129319	0.157441	0.114705	0.257662
4930402F06Rik	0	0	0	0	0	0
4930402H24Rik	5.29091	1.50011	15.0589	16.55	12.6325	13.2416
4930403L05Rik	0	0	0	0	0	0
4930403N07Rik	0.0802178	0.1593	0.283981	0.191079	0.414005	0
4930404A10Rik	0	0	0	0	0	0
4930404H21Rik	0	0	0	0	0	0.310891
4930404I05Rik	0.0556367	0	0.265535	0.746808	0.233343	0
4930404N11Rik	4.40827	1.39417	19.7633	14.1673	12.3146	17.613
4930407I10Rik	0	0	0	0.0401215	0	0
4930408F14Rik	0	0	0	0	0	0
4930408F14Rik	0	0	0	0	0	0
4930408F14Rik	0	0	0	0	0	0
4930412C18Rik	0.545535	0.0927103	0.256662	1.17406	1.82698	1.79268
4930412F15Rik	0	0.0677901	0.961643	0.905998	0.379123	0.599422
4930412O13Rik	0.0225437	0.0793115	0.0797584	0.052655	0.0671315	0
4930415F15Rik	0	0	0.189426	0.267845	0.698419	0.235225
4930415L06Rik	0	0	0	0	0	0
4930417G10Rik	0.015386	0	0.153965	0.62044	0.180658	0.169451
4930417O13Rik	0	0	0	0.182258	0	0
4930420K17Rik	83.3571	13.8042	10.9165	13.1383	7.76645	6.35594
4930422G04Rik	0.0162978	0.0594976	0.056999	0.550833	0.468882	0.519455
4930426L09Rik	0	0.041197	0.260691	1.63748	0.269633	0.283057
4930427A07Rik	0.0633807	0.0961182	0.251347	3.31883	1.58386	1.71878
4930428D18Rik	0	0	0	0	0	0
4930428E23Rik	0.0765613	0	0	0.082596	0.120394	0
4930429B21Rik	0.026844	0.0971623	3.22135	2.85221	2.19046	1.74342
4930429F11Rik	0	0	0	0	0	0
4930430A15Rik	0	0	0	0.291353	0	0
4930430D24Rik	0.0945715	0.00264519	0.000533528	0	0	0.000422839
4930430F08Rik	2.38156	2.58429	2.29019	7.44025	5.92506	7.30208
4930431A04Rik	0	0	0	0	0	0
4930432K09Rik	0	0	0.0966393	0	0	0
4930432K21Rik	0.108405	0.440451	0.861931	0.635626	0.95215	0.898532
4930433I11Rik	0	0	0	0	0	0
4930433N12Rik	0.0333328	0	0	0.145609	0.0945159	0
4930434E21Rik	0	0.0236776	0	1.6682	0	0
4930435E12Rik	0	0	0	0	0	0
4930441O14Rik	0.128801	0.0346102	0.52355	0.289694	0.377438	0.195844
4930442L01Rik	0.0899855	0	0	0	0	0
4930443G12Rik	0	0	0	0	0.0468474	0.314181
4930444A02Rik	1.72671	5.70686	11.0902	4.12573	6.4299	7.81525
4930444G20Rik	0	0	0	0	0	0.0581886
4930447C04Rik	0	0	0.216385	0.0440108	0.485741	0.365047
4930448K20Rik	0.140371	0.294122	0.0886594	0	0	0
4930449I24Rik	0	0	0	0	0	0
4930451C15Rik	0	1.10075	0.720931	1.80691	0	0
4930451I11Rik	0	0	0	0	0	0
4930452B06Rik	0.917975	0	2.20941	10.1288	2.5208	2.38842
4930453N24Rik	12.8583	58.4146	18.9414	19.5517	10.1804	14.8941
4930455C21Rik	16.2557	22.0143	14.8283	10.5042	11.1974	13.6897
4930455F23Rik	2.42378	7.51725	8.836	13.9181	8.67655	8.23804
4930458L03Rik	0	0	0	0	0	0
4930465K10Rik	0.0859713	0.157115	0.205287	0.210132	0.343971	0.677745
4930467E23Rik	0.00784317	0	0.0442171	0.111732	0.0606859	0.102374
4930469G21Rik	0	0	0.133902	1.57335	0.153064	0
4930470P17Rik	0	0	0.0864336	0	0	0.0940548
4930471G03Rik	0	0	0	0.0830625	0.2757	0.378177
4930471M23Rik	7.21149	4.67283	14.0782	8.31702	15.3221	19.126
4930473A06Rik	0.771686	0.0912787	0.183184	3.7772	0.815204	1.11397
4930474M22Rik	0	0.108678	0	0.234549	0.122908	0.201837
4930474N05Rik	0	0	0	0	0	0.144736
4930479M11Rik	0	0	0	0.413666	0	0
4930480E11Rik	0	0	0	0	0	0
4930481A15Rik	9.9114	8.87248	4.43566	0.858447	0.268679	0.0951847
4930483J18Rik	0	0.106614	0.10611	0	0	0.094402
4930486L24Rik	0.0732793	0.355427	0.271402	0.105608	0.143825	0.181765
4930488L21Rik	0	0	0.407299	4.62716	0.588432	0.886081
4930502E18Rik	0	0	0	0	0.956512	0.632908
4930503B20Rik	0	0.115457	0	0.0396635	0.0597083	0
4930503E14Rik	0	0	0	0	0.0118867	0.152038
4930503E24Rik	0.220305	0.0886898	0.261454	0.000654697	8.11632e-05	0.000555204
4930503H13Rik	0	0	0	0	0	0
4930503L19Rik	0.375735	0.410577	1.0353	1.93754	2.40993	3.13106
4930504O13Rik	0	0	0	0	0	0
4930505A04Rik	0	0.0587369	0.127491	0.938692	0.132068	0
4930506M07Rik	8.7245	0.633164	4.46952	12.4613	8.06726	8.59017
4930507D05Rik	0.383884	0.677652	0.278632	0.615915	0.659146	0.699458
4930511I11Rik	0	0	0	0	0	0
4930511M06Rik	0.0156346	0.498733	0.230393	1.98122	0.0857254	0
4930511M11Rik	0	0	0	0.0661585	0	0
4930512B01Rik	0	0	0.0776123	0.378662	0.129566	0.409864
4930513N10Rik	0.283398	0.316245	0.808902	1.62308	0.800614	1.00183
4930515G01Rik	0.265702	0.215343	0	1.1619	0.681182	0.103601
4930515G16Rik	0.000791054	0.0023964	0	0	0	0
4930519F09Rik	0.073966	0.492065	0.285803	0.00184406	0.00229	0.00361405
4930519F16Rik	0	0	0	0	0	0
4930519G04Rik	0	0	0	0.061635	0.0339002	0
4930521A18Rik	0	0	0	0.00175738	0	0
4930522H14Rik	0	0	0	0	0	0
4930523C07Rik	2.12146	1.61938	0.772526	2.01346	0.840309	1.94544
4930524B15Rik	0	0	0	0	0	0.0815481
4930524E20Rik	0	0	0	0	0	0
4930524L23Rik	0.0519699	0.0946023	0.911014	0.614235	0.30463	0.583027
4930525F21Rik	0.0255228	0.0310339	0.0681983	0.198941	0.54718	0.39935
4930526D03Rik	0	0	0	0	0	0.312116
4930526I15Rik	0	0	0	0	0	0
4930528A17Rik	0.0205551	0.0745664	0	0.466431	0.220741	0.541639
4930528F23Rik	2.22641	0.0533226	0	0.414854	0.0363396	0.10894
4930529C04Rik	0.025985	0.0729219	0.00863363	0.0752257	0.01658	0.000634231
4930529F22Rik	0	0	0	0	0	0
4930529M08Rik	0.0606332	0	0.305283	9.04835	0.794957	0.257614
4930534B04Rik	0.253582	0.172214	0.419697	10.2474	1.75706	1.92804
4930538K18Rik	0	1.19152	1.02709	5.14475	0.660025	0.299818
4930539E08Rik	0.0314051	0.0126254	0.841424	0.0673419	0.0569151	0.0589521
4930539J05Rik	13.8095	14.3393	9.07145	5.24663	3.407	7.80513
4930542N07Rik	0	0	0	0	0	0
4930544D05Rik	0	0.128731	0.234879	0	0	0
4930544G11Rik	0.0341549	0	0	0	0	0
4930544O15Rik	0.0724978	1.41864	0.70757	0.535568	0.927675	0.164767
4930547C10Rik	0	0	0	0	0	0
4930547N16Rik	0	0.0270632	0.43998	0.197356	0.359012	0.503899
4930548H24Rik	0	0	0	0.0253213	0	0
4930549C01Rik	0	0	0	0	0	0
4930550C14Rik	0	0.119705	0	0.306837	0.189385	0.313517
4930550L24Rik	0	0	0	0	0	0
4930555G01Rik	0	0	0	0	0	0
4930555I21Rik	0	0.0487577	0.678619	1.18734	1.1232	1.11497
4930558C23Rik	0	0.101322	0	0.079578	0	0
4930562C15Rik	0.0124134	0	0	0.281468	0.0318811	0.115899
4930563D23Rik	0	0	0	0	0	0
4930563E22Rik	0.0267865	0.214823	0.311724	0.926021	0.644588	0.763796
4930567H12Rik	0	0	0	2.63478	0.148795	0
4930567H17Rik	0	0	0	0	0	0
4930568D16Rik	0	0	0	0	0	0
4930571K23Rik	0	0	0	0.0163102	0	0
4930572J05Rik	4.34291	15.6331	66.6284	135.5	131.253	120.971
4930578C19Rik	0	0.585364	0.196693	0.229079	0.272906	0.480256
4930578I06Rik	0	0	0	0.0409797	0	0
4930578N16Rik	0.179868	0.210892	0.262229	5.13815	1.04668	1.18401
4930579C15Rik	0	0	0.0939505	0.45591	0	0
4930579F01Rik	0.081962	0.0322192	0	0	0	0
4930579G22Rik	1.036	0.892796	2.10096	2.47245	0.213416	0.194496
4930579G24Rik	0.248946	1.38009	1.0513	2.02006	1.25154	1.45923
4930579J09Rik	0	0.0390316	0.605411	2.36212	0.0856723	0.0618084
4930579K19Rik	0.046022	0.0566136	0.119849	3.14149	0.307503	0.162467
4930581F22Rik	3.14134	0.211831	1.06354	4.39937	0.240169	0.248567
4930583H14Rik	0	1.60657	0.940283	0.233838	0.228594	0.347317
4930583K01Rik	0	0	0	0.054541	0	0
4930584F24Rik	0	0	0	0	0	0
4930588N13Rik	0	0	0.112232	4.76386	0.254152	0.129614
4930590J08Rik	0.0133321	0	0.0313168	0	0.114012	0
4930592I03Rik	0	0.0591333	0	2.0103	0.149874	0.521344
4930594C11Rik	0.303066	0.110352	0.118656	1.71863	0.253716	0.218931
4930595M18Rik	0	0	0	0	0	0
4930596D02Rik	0	0	0	0	0	0
4931406B18Rik	0	0	0	0.0483084	0	0.0295366
4931406C07Rik	84.843	5.33176	6.77956	83.0641	9.81939	10.2439
4931406H21Rik	0.0397799	0.0160547	0.031207	3.1313	0.378584	0.611523
4931406P16Rik	2.45747	7.5679	7.23195	11.2316	8.48481	12.0412
4931407G18Rik	0	0	0	1.00985	0	0
4931408A02Rik	0.387084	0.333403	1.11054	3.9486	6.81382	5.52424
4931408C20Rik	0	0	0	0.0385811	0	0.0503858
4931409K22Rik	0	0	0	0	0.0438684	0
4931414P19Rik	1.80304	1.91432	2.3219	2.02413	1.42625	1.9796
4931417E11Rik	0	0	0	0	0	0
4931417G12Rik	0.0622008	0	0.0768262	0.060436	0.094798	0.0835366
4931423N10Rik	0	0	0	0.157788	0	0
4931428F04Rik	0.363178	4.01158	11.7857	3.02747	19.8938	16.6849
4931428L18Rik	0	0	0	0.175297	0	0
4931429I11Rik	0	0	0.0925705	13.3978	3.83727	5.76893
4931429L15Rik	0	0	0.0532631	0.110023	0	0
4931440F15Rik	1.23027	20.1528	8.26874	1.8334	0.855305	1.2996
4931440L10Rik	0.0397462	0	0	0	0	0
4931440P22Rik	0.113329	0.504687	0.505389	0.333089	0.255618	0.256503
4932411E22Rik	0	0.13546	0.576392	1.07748	4.91887	5.23663
4932411G14Rik	0	0	0	0.00995	0.0317687	0
4932411N23Rik	0	0	0	0.0118182	0	0
4932412H11Rik	0.0466397	0	0	0.199972	0.102306	0
4932414J04Rik	0	0	0	0	0	0.0769952
4932414N04Rik	0	0	0	0	0.0131075	0
4932415G12Rik	0.413936	0.546068	2.29518	3.65897	3.88548	4.58752
4932415M13Rik	0	0	0	0	0	0
4932416H05Rik	0.0942436	0.45801	1.54404	2.20622	1.47963	1.23362
4932418E24Rik	0	0	0.408873	23.5176	0.31546	0.0741207
4932425I24Rik	0.0315223	0	0.580768	33.128	0.243033	0.178386
4932429P05Rik	0	0	0	0	0	0
4932435O22Rik	0	0.0312169	0	0.0239484	0.112826	0.239373
4932438A13Rik	2.27179	1.00723	2.37399	20.1559	16.7977	11.6372
4932438H23Rik	0	0	0.173223	0.073689	0.173343	0.0585303
4932441B19Rik	0	0	0	0	0	0
4932441J04Rik	0	0	0.543558	2.17544	1.10003	0
4932443I19Rik	0	0	0.565432	2.68856	0	0
4933400A11Rik	0.000615216	0	0.0956113	0.657987	0	0.146359
4933400C05Rik	0	0	0	0	0.12167	0.0770591
4933400F21Rik	0	0	0.0316284	2.35229	0.368552	0.446828
4933401B06Rik	0	8.1775e-05	0.00022248	0.0344649	0.109763	0
4933402E13Rik	0	0	0	0	0	0
4933402J07Rik	0	0	0	0.0369046	0	0
4933402N03Rik	0	0	0.0941244	0	0	0
4933402N22Rik	0	0	0	0	0	0
4933402P03Rik	0	0	0	0	0	0
4933403F05Rik	9.12655	7.30764	3.17811	5.05566	7.19054	6.15274
4933403G14Rik	0.156977	1.13447	0.942051	3.74747	1.17151	0.738584
4933403O03Rik	0	0	0	0.136279	0.0423413	0
4933403O08Rik	0	0	0.0782007	0	0.042784	0
4933404M02Rik	0.0283655	0	0.263197	2.59701	0.0420131	0
4933404O12Rik	1.39391	0.574586	2.75675	11.047	2.02335	2.22952
4933405L10Rik	0	0	0.331101	0.161821	0	0
4933405O20Rik	0	0.0909187	0	0	0	0
4933406F09Rik	0	0	0	0	0	0
4933406I18Rik	0	0	0.145351	0.134333	0.0870323	0.278432
4933406J08Rik	0	0	0	0	0	0
4933406K04Rik	0	0	0	0	0	0
4933406M09Rik	0	0	0.0721548	0.12749	0	0.0847921
4933407C03Rik	15.6855	3.4897	81.7747	382.826	84.8621	73.0118
4933407H18Rik	0.311664	0.220686	0.168578	4.04184	0.981304	0.735642
4933407K13Rik	0.038992	0.0157729	0.0326184	0.549905	0.21831	0.0736359
4933407L21Rik	0	0.385273	0.736264	0.282652	0	0
4933407P14Rik	0	0	0	0.10084	0	0
4933408B17Rik	0.0172911	0.0632992	0	0.506017	0.0782814	0.115887
4933409G03Rik	0	0	0	0	0	0
4933409K07Rik	0	0.0279144	0.146347	0.0430464	0.0333146	0.0434499
4933409K07Rik	0	0.0279144	0.146347	0.0430464	0.0333146	0.0434499
4933409K07Rik	0	0	0	0	0	0
4933411G11Rik	0	0	0	0.109539	0.0295947	0.0577242
4933411K16Rik	0.416673	0.170516	0	0.115461	0	0.260078
4933411K20Rik	2.67602	3.04476	2.2597	9.32568	13.0639	13.9031
4933412E24Rik	0	0	0	0	0	0
4933413G19Rik	0	0	1.17749	35.4834	0.61819	0.478116
4933415F23Rik	0.00141072	0.177907	0.00302368	0.000384379	0.0441204	0.133442
4933416C03Rik	0	0	0	0.0982101	0	0
4933417A18Rik	0	0	0	0.0422381	0	0
4933417G07Rik	0.0617209	0.00101765	0	1.30205	0.000714238	0.0016716
4933421E11Rik	2.5838	3.80283	2.25264	5.6847	3.17587	4.31738
4933421I07Rik	0	0	0	0	0	0
4933421O10Rik	0.53038	0.912043	1.33659	3.31687	0.872525	1.00547
4933422H20Rik	0.775302	0	0.0607664	0	0.437615	0.224697
4933424B01Rik	4.5597	3.15346	3.44631	10.8634	4.1739	6.08175
4933425L06Rik	0	0	0.0498687	0	0	0.0707333
4933425O20Rik	0	0	0	0.87117	0.286019	0.0924977
4933426M11Rik	12.4689	12.6497	13.6089	31.4263	38.1535	43.645
4933427D06Rik	0	0	0	0	0.0519336	0
4933427D14Rik	0.521451	0.48681	2.02136	5.68627	1.69321	1.65852
4933427E11Rik	0	0.0530875	0.101776	0.153295	0.191271	0
4933429O19Rik	0	0	0	0	0	0
4933430H15Rik	1.81108	1.22105	3.90892	4.51981	8.78315	7.22374
4933430I17Rik	0.0249562	0.0300941	0.12012	0.107333	0.397003	0.115105
4933431E20Rik	0.312178	0.72587	11.8277	4.00224	10.0553	11.1069
4933432B09Rik	0.0308208	0.0281203	0.277083	6.3764	0.296301	0.352367
4933432I09Rik	0	0.209409	0.515889	0.252778	0.249076	0.601931
4933433C11Rik	0	0	0.0864903	0.0880895	0	0
4933433P14Rik	3.14887	6.63633	11.055	5.39453	19.6176	19.5918
4933434E20Rik	19.7094	61.9893	32.6673	27.9877	28.2228	32.9986
4933434I20Rik	0	0	0	0	0	0
4933436C20Rik	0	1.38494	0.830361	0.460803	0	0
4933436I01Rik	0	0	0	0	0	0
4933437F05Rik	0.140422	0.126917	0.43437	1.00059	0.818949	0.534592
4933439C10Rik	1.00917	1.65324	5.75963	3.99682	2.21296	1.45525
4933439F11Rik	0	0.059425	0.173751	0.462219	0.115522	0
4933439F18Rik	7.59063	22.8948	13.1216	13.734	23.5276	22.2633
5031410I06Rik	0	0	0	0	0.0111299	0.0882484
5031414D18Rik	0.124922	0.195517	0.47301	1.97611	0.380658	0.863024
5031425F14Rik	0.128627	0.0723178	0.134545	0	0	0.0401414
5031426D15Rik	0	0.00830876	0	0.319232	0.17845	0.17302
5031434O11Rik	0	0.719762	0.821736	3.69369	0.349744	0.175899
5031439G07Rik	7.96524	32.6964	32.054	19.6489	17.6266	23.5924
5033404E19Rik	0.0769345	0	0.968129	0	0.107327	0
5033406O09Rik	1.21343	0.06722	0.408083	0.076742	0	0.322765
5033411D12Rik	16.9604	0.373994	1.59706	2.04388	1.0254	0.614577
5033414D02Rik	2.38886	17.9427	9.22418	13.5375	7.64805	4.10807
5133401N09Rik	14.8638	4.42598	12.7487	5.67112	12.4411	11.8062
5330413P13Rik	0	0	0.132114	3.78414	0.131985	0
5330417C22Rik	0.28784	0.257606	4.4332	45.0883	7.97242	4.25297
5330426P16Rik	0.172627	0.811538	1.42119	4.41945	18.5517	23.9487
5330434G04Rik	0.0213212	0	0.0589461	0.500331	6.01212	3.38594
5330437I02Rik	0	0.0344716	0.0351034	0.0704697	1.40921	0.227602
5330439B14Rik	0.101169	1.27745	0.774996	0.468924	0.197366	0.291213
5430402E10Rik	0	0	0	1300.27	6.48646	0.156322
5430402O13Rik	0.562538	0.0679907	0.533737	2.22371	0.259346	0.303384
5430405G05Rik	0	0.337774	2.94879	4.27811	1.43992	0.959888
5430405H02Rik	0.782185	1.12546	1.90115	6.86332	3.7519	5.59257
5430407P10Rik	6.53153	0.555634	2.25353	15.0361	1.35699	1.86235
5430411K18Rik	2.66871	2.84105	5.37868	10.0768	9.00829	6.63094
5430413K10Rik	0	0	0	228.415	0.272839	0
5430416N02Rik	4.27105	1.76995	7.41218	6.25411	3.93571	2.42373
5430416O09Rik	0.0592365	0.879175	0.53746	0.100274	0.160317	0.156847
5430417L22Rik	4.23078	1.61467	9.10423	6.38848	5.12713	3.46058
5430419D17Rik	0.141471	0	0	296.712	0.82605	0
5430427O19Rik	0.0845101	0.0791552	0.0596829	0.260352	0.0713833	0.260501
5430435G22Rik	0.562659	1.47283	0.910281	1.03219	1.22638	2.07616
5430437P03Rik	44.3506	58.1321	75.3228	26.4058	34.3541	32.673
5530400C23Rik	0	0	0	0	0	0
5530601H04Rik	0.186669	0.173446	0.466576	2.80422	1.16573	1.60075
5730403B10Rik	28.8331	35.5086	90.2026	40.0695	41.332	41.2403
5730408K05Rik	11.0923	5.06378	3.10058	245.068	28.3147	94.451
5730409E04Rik	2.32498	15.9883	30.2338	4.6634	49.2276	42.0223
5730416F02Rik	0	0.0104476	0.017213	0.0766405	0.740681	0.171495
5730419I09Rik	0.993279	1.34077	5.94561	23.5724	10.9159	12.715
5730422E09Rik	0	0	0.0624215	0.406515	0.0377527	0
5730437N04Rik	29.2486	100.503	67.624	29.6025	36.9186	31.4327
5730455O13Rik	8.40671	8.10479	6.09275	5.82641	7.9469	5.75592
5730455P16Rik	2.1288	8.32632	5.899	7.16976	20.099	16.1458
5730469M10Rik	30.5604	25.6308	50.024	95.6488	22.5865	25.0976
5730494M16Rik	1.42242	2.50606	7.34685	12.3643	24.878	21.3618
5730494N06Rik	17.0875	28.83	31.8274	25.2433	49.3473	32.4416
5730507C01Rik	0.0510091	0.0613687	0.0454067	0.0181314	0.107325	0.297159
5730508B09Rik	2.21729	4.08873	2.8083	8.10956	3.23458	4.02936
5730522E02Rik	0.0568165	0	0.0746776	0.496447	0.090696	0.10862
5730528L13Rik	0.247223	9.47998	8.25927	3.02758	6.06193	4.84873
5730559C18Rik	0.0745734	0.0873956	1.31913	0.764582	0	0
5730577I03Rik	0.102118	0.104516	0.183613	0.940382	0.237407	0.433368
5730590G19Rik	0.00606977	0.014608	0.0291313	0.326698	0.0332533	0.0432825
5730601F06Rik	0.995117	0.74687	0.477127	13.7725	8.96628	7.73251
5830403L16Rik	0.033984	0.173438	0.350677	0.22311	0.522914	0.558333
5830405N20Rik	0.0522163	0.0940588	0	0.0853595	0	0
5830411N06Rik	0	0	0	0.0824333	0	0
5830415F09Rik	1.92418	1.76397	1.61318	2.29572	1.36726	2.03339
5830416P10Rik	0.032434	0	0.173949	0.0454886	0.0346301	0.0584921
5830417I10Rik	1.08257	1.37584	2.51253	4.23443	1.97557	3.10281
5830418K08Rik	0.485701	0.536106	0.614703	4.73917	2.56422	2.6598
5830432E09Rik	0.146209	0.436001	0.0856203	0.232106	1.24964	2.31176
5830433M19Rik	1.86404	0.850917	1.89307	6.64338	2.34633	2.87034
5930412G12Rik	0	0.615218	0.95869	0.0879105	0.385863	0.287005
5930416I19Rik	2.4135	4.17433	9.23317	7.26439	5.85334	5.28605
5930434B04Rik	13.668	14.9802	15.4287	33.7635	17.1476	18.4281
6030405A18Rik	0.0607201	0.0187824	7.58786	1.85753	1.9048	4.61829
6030408B16Rik	0	0.212054	0.0659784	0.278599	0.820439	2.10775
6030419C18Rik	0	6.49577	85.048	6.02997	66.2743	41.5253
6030422M02Rik	0.0160754	0	0.0864717	0.234177	0.180273	0
6030429G01Rik	0.147272	0.114651	1.11716	2.96031	0.460303	0.786605
6030446N20Rik	1.85682	0.967688	1.87758	3.00741	3.01581	3.45184
6030458C11Rik	3.12217	6.21909	4.67538	11.9287	9.31244	11.4527
6030468B19Rik	0	0.0647428	0.121696	0.0899105	0	0.0920391
6030498E09Rik	0.0785283	0	0	0	0.0628393	0.322722
6230400D17Rik	0.238802	0.534742	0.599415	1.61645	0.596987	0.351258
6230409E13Rik	0	0.0594044	6.16481	16.6014	43.2253	40.1704
6230427J02Rik	0.447897	3.29947	3.14138	2.61363	4.71306	8.63355
6330403A02Rik	0.0528861	0.345156	34.8288	0.189437	1.57161	1.48832
6330403K07Rik	0	0.209366	194.609	4.84628	23.9032	29.3823
6330406I15Rik	0.0294282	5.6579	3.5945	0.783477	3.59027	5.29643
6330407A03Rik	0	0	0	0.672551	0	0
6330407J23Rik	0	0.0423836	10.3512	10.9506	54.8655	63.0962
6330408A02Rik	0.77354	3.20674	4.17054	4.92702	5.56797	7.63235
6330409N04Rik	14.1642	47.6962	23.5097	8.15888	29.6863	33.4833
6330416G13Rik	1.73848	5.25278	5.65771	42.7884	3.12133	2.21971
6330439K17Rik	0.070454	0.0792058	14.6885	13.269	25.3757	18.7099
6330503K22Rik	0.36896	0.349914	3.42886	39.5528	17.146	18.6105
6330512M04Rik	0	0.417107	6.90192	0.456132	2.26242	2.73481
6330527O06Rik	0	0	70.259	0.13998	0.149496	0.936393
6330545A04Rik	0.0635897	0.238845	0.441652	3.84171	0.288906	1.12973
6330549D23Rik	0.279615	0.252775	0.370024	0.66376	0.403002	0.230103
6330577E15Rik	24.809	63.5851	55.3614	36.1436	43.485	46.704
6330578E17Rik	20.4139	33.6782	21.2373	30.2557	28.9703	37.4219
6430411K18Rik	0	0	0.974185	0	2.05068	1.50989
6430527G18Rik	12.2241	9.45581	36.4299	53.4106	25.24	24.3606
6430531B16Rik	0	0.05441	0.936673	3.02542	1.01794	0.175197
6430548M08Rik	1.98385	4.8849	89.0807	31.5588	57.7712	47.1669
6430550D23Rik	0.363697	0.121341	0	1.69774	0.247569	0.271721
6430562O15Rik	2.74197	3.52957	5.21072	1.03696	2.05526	2.16784
6430571L13Rik	0.285287	16.7926	10.0443	0.249595	6.977	4.11518
6430573F11Rik	1.18221	0.0989003	5.99314	0.974768	2.82745	1.17904
6430598A04Rik	0.0618947	0.107581	29.9108	1.71093	27.0675	23.5973
6430704M03Rik	0	0	15.0347	0.128292	17.4412	9.09808
6530401D17Rik	0.151375	1.21327	22.5171	9.59467	7.75856	11.5318
6530401N04Rik	3.98059	2.07754	2.91389	3.46255	2.7334	3.54276
6530402F18Rik	0.252965	0.980831	3.29973	0.70726	10.0994	4.97864
6530411M01Rik	0	0.048941	0.0976713	0.658831	0.126775	0
6530418L21Rik	0.0201986	1.70587	15.6562	1.33136	11.2662	18.7983
6720401G13Rik	0.984476	1.13693	2.72403	15.9499	4.24762	3.2317
6720456B07Rik	68.0089	69.3998	155.794	47.8606	74.4053	81.056
6720456H20Rik	3.9092	0.908954	4.0662	7.48864	3.2914	3.55652
6720463M24Rik	0.372766	0.429888	0.393218	0.63146	0.576959	0.293512
6720489N17Rik	0.0150868	0	0.0307397	0.164275	0.757981	0.421741
6820408C15Rik	0	0	1.42062	3.12784	0.624311	0.37156
6820431F20Rik	2.52936	2.27669	3.70644	21.7334	26.4954	35.3818
6820431F20Rik	1.52058	1.32546	2.44718	13.0869	15.0546	19.3298
7420426K07Rik	0	0	0	0	0	0
7420461P10Rik	0	3.55332	1.28442	0	0.097516	0.327165
7530420F21Rik	0	0.0573928	0	0.126419	0	0
8030411F24Rik	0	0	0	0	0	0
8030462N17Rik	1.81042	4.56697	3.31194	12.4817	10.1235	9.90634
8430406I07Rik	2.57327	5.92541	3.03155	2.16275	2.03524	2.28742
8430408G22Rik	59.4208	22.1222	7.83167	3.52944	1.38843	3.74786
8430410A17Rik	4.59712	4.03175	11.8865	8.03156	6.51125	5.405
8430410K20Rik	7.38736	13.454	12.0629	10.7979	22.1521	21.7613
8430419L09Rik	10.5144	1.85095	61.4434	25.3131	33.6382	28.6227
8430427H17Rik	0.179157	0.12545	3.55734	19.8582	16.5501	23.6847
8430429K09Rik	0.491983	1.09126	1.14928	3.49345	1.36588	0.45615
8430431K14Rik	0	0	0	0.519127	0.427819	0.255968
9030025P20Rik	2.0359	3.22123	3.16348	7.02907	2.23226	3.26672
9030224M15Rik	0.218963	0.538058	0.729622	2.65561	0.164916	0.503112
9030409G11Rik	0.430931	0.770528	26.2709	49.5475	33.3077	27.2939
9030418K01Rik	0.10168	0.780232	10.7638	2.96354	10.8954	8.14516
9030425E11Rik	0.323052	1.44879	4.36228	10.7242	17.6506	14.2263
9030612E09Rik	0	1.64968	1.53202	2.21581	0.457918	0.42223
9030617O03Rik	12.5164	10.6054	5.89088	5.87401	3.18625	3.54968
9030619P08Rik	2.92264	0.18912	0.541601	0	0	0.634416
9030624J02Rik	9.05558	8.70117	18.8343	17.9856	20.6474	22.6686
9030625A04Rik	2.11823	0.583264	0.856584	4.73199	3.17983	5.63731
9130008F23Rik	0.0223664	0.221493	0	1.18436	0.0665421	0.13033
9130011E15Rik	3.22137	6.01026	8.32873	12.7204	11.3461	11.3937
9130011J15Rik	17.5624	22.654	23.0572	29.4925	24.9499	31.0174
9130017N09Rik	0.164856	0.0242863	0.0894986	6.71668	0.35268	0.636692
9130019O22Rik	0.769171	0.956548	1.19853	2.24065	1.25163	1.63664
9130019P16Rik	0.148241	0.140606	2.79378	0.33597	1.01246	2.15494
9130023H24Rik	0.759473	0.35473	0.530919	3.79106	2.04374	1.41124
9130024F11Rik	0.0261319	0.0918024	1.93682	1.23224	0.21519	0.10719
9130204L05Rik	0	0	0	0	0.36528	2.03083
9130206I24Rik	0.0307517	0.10949	0.110154	0.157676	0.464756	1.27604
9130209A04Rik	0	0	0	0	0	0
9130230L23Rik	0	0.241178	0	0.736907	0	0
9130401M01Rik	19.3508	17.8515	28.7614	10.2135	10.4002	10.9312
9130404H23Rik	0	0.596118	0.12892	0.068791	0.0732429	0
9130409I23Rik	20.6491	0.0671822	0.14186	0.182787	0.000884114	0.00136279
9230102K24Rik	0	0	0	0	0	0
9230104L09Rik	0	0.103395	0	0	0	0
9230105E10Rik	1.43612	0.904509	0.511863	3.05236	2.00385	3.89378
9230107M04Rik	0.126378	1.47636	0.339282	0	0	0
9230110C19Rik	0.245338	0.27103	1.85287	8.17879	4.42961	2.75107
9230110F15Rik	0	0	0	0	0	0
9230113P08Rik	0	0	0	0	0	0
9230114K14Rik	0.125579	0.495751	0.141974	2.37737	0.767729	0.683905
9230115E21Rik	0.00820877	0.342745	0.763203	0.033572	0.624109	0.201775
9230116N13Rik	0.0417536	0.07665	0.209051	0.51622	0.0631885	0.0591965
9330020H09Rik	0.391165	0.251993	0.442736	1.37415	0.454826	0.446597
9330111N05Rik	0	0.0414181	0.0850982	0.28639	0.0490479	0
9330129D05Rik	3.41095	15.1205	5.73101	4.34823	1.77951	2.29703
9330133O14Rik	0.127907	0.209566	0.362724	0.524162	0.222627	0.389968
9330151L19Rik	0.684005	1.26267	6.29339	10.8239	3.97918	2.81327
9330158H04Rik	0	0	0.111705	0	0.0928155	0.0681052
9330159F19Rik	0	4.66234	5.13943	4.60003	15.5851	14.1403
9330175E14Rik	0.0659906	0	0.0787269	0.125454	0.0493556	0
9330176C04Rik	0.0235577	0.0284482	0.0542132	0.10086	0.547292	0.225192
9330182L06Rik	0.0359662	0	3.48724	19.3865	20.0946	21.0584
9430007A20Rik	0	0	0	0	0	0
9430008C03Rik	0.86561	0.531618	0.742982	1.92537	0.57862	1.21283
9430015G10Rik	1.23302	1.26142	5.24179	5.4634	2.90166	3.42452
9430016H08Rik	15.4913	23.1179	12.8473	8.08124	7.28553	4.51371
9430020K01Rik	1.33407	5.11106	15.7096	6.61432	12.177	14.9106
9430021M05Rik	0	0	2.6365	0.0660375	1.92347	4.1158
9430023L20Rik	26.426	46.4046	40.5516	20.5292	22.0402	30.5236
9430031J16Rik	0	0	0.621856	10.5696	1.52044	1.97113
9430038I01Rik	4.59959	3.12629	1.98881	1.20525	0.81963	1.082
9430041J12Rik	0	0	0.211617	0.505101	0.932851	0.648779
9430060I03Rik	0.0686283	0.0833389	0	1.36479	0.107259	0.1481
9430070O13Rik	0	0	0	0	0	0
9430076C15Rik	0	0.0177878	0.0367273	0.269333	0.0428623	0.0820163
9430083A17Rik	0.11474	0.0699817	0.55496	4.01995	0.331744	0.806412
9530002B09Rik	4.08497	0	0.166024	0.062237	0	0
9530003J23Rik	12.0773	82.0648	23.059	0	0.057149	0
9530008L14Rik	31.4629	0.222476	0.690666	4.05099	0.0892393	0
9530009M10Rik	0.0274094	0.599949	0.113536	2.19726	0.631682	1.37565
9530026P05Rik	0.102849	0.711966	0.551587	3.19687	2.45617	1.59211
9530036O11Rik	0	0.0194256	0.24128	0	0.755666	0.453188
9530053A07Rik	3.78302	0.00454796	0.11969	0.223516	0.161068	0.346594
9530059O14Rik	0	0	0.0934908	0.228709	2.12005	2.30825
9530068E07Rik	54.8594	45.0493	40.2034	70.1255	49.4923	52.2399
9530077C05Rik	0.0209268	0.303607	2.36344	7.2087	5.75045	3.84437
9530082P21Rik	3.71774	5.60144	51.929	10.9765	24.7673	28.0462
9530091C08Rik	0.0162616	2.25592	0.83494	2.02283	0.390076	0.255366
9630013A20Rik	0	0	0.0564259	0.753613	0	0.120218
9630028H03Rik	0	0	0	0.199895	0.0336359	0
9630033F20Rik	3.56623	63.4716	25.1881	3.00513	12.1255	10.6637
9830001H06Rik	0.381657	0.41649	10.293	9.1792	9.39636	9.64215
9830107B12Rik	0	0.0157941	0	0.0168952	0.0191063	0.0782167
9930012K11Rik	0.0776865	0.344278	0.595703	1.23185	1.55013	2.0031
9930013L23Rik	0.00639587	0.0459746	2.36952	4.70468	4.18161	1.82095
9930014A18Rik	0.39095	0.439808	0.918317	8.85532	0.427218	0.163577
9930021D14Rik	2.04681	4.53418	10.3264	9.13138	6.85518	7.09874
9930021J03Rik	1.63202	1.40105	2.50003	15.17	7.48205	6.79525
9930023K05Rik	0.0557682	0.204209	0.0904693	1.01865	0.12405	0.0831974
9930032O22Rik	0	0	0	0.050249	0	0
9930104L06Rik	0.458189	2.513	2.44014	2.95879	1.87984	2.51884
9930111J21Rik1	0.204524	0.243316	0.0893592	0.562183	0.773643	0.768748
9930111J21Rik2	0.124001	0.16842	0.144822	0.491278	0.477214	0.740222
9930111J21Rik2	0.0247105	0.0346918	0.0752702	0.142286	7.75704e-07	0.000195329
a	0	0.354639	0	0.572033	0	0.319757
A030009H04Rik	0.560774	0.0628536	47.1633	9.96104	4.09777	4.82902
A130010J15Rik	1.47682	1.79144	1.11744	2.55525	2.25611	1.95368
A130022J15Rik	1.25681	1.59149	2.63281	9.44087	5.02486	6.60381
A130040M12Rik	0.0128616	0	0	0	0	0
A130049A11Rik	0.784194	0.808208	1.31624	8.10441	3.44442	1.98661
A1bg	0.0553591	0.0996619	0	0.0238521	0	0
A1cf	32.6703	0	0.731308	0	0	0
A230020J21Rik	0.228665	1.79394	0.979382	2.99276	1.89829	3.60963
A230046K03Rik	2.91203	1.06977	1.30385	11.2957	20.7903	20.4594
A230050P20Rik	7.40692	0.835309	18.7398	3.54048	7.36862	5.57642
A230051G13Rik	3.96073	4.29723	3.96274	1.56249	1.40038	2.02758
A230056P14Rik	0.385194	0.389327	1.82322	1.45404	5.85659	2.46333
A230057D06Rik	0	0	0.0603805	0.0212167	1.4241	0.673315
A230065H16Rik	0	0	6.99489	0.161632	0.295033	0.615376
A230072C01Rik	0.654802	0.68498	1.35515	2.6002	1.22461	1.58002
A230072E10Rik	0.0251918	0.0466079	0.100786	0.401338	0.36539	0.2403
A230073K19Rik	0.65283	0.456003	0.449955	3.1573	4.13426	3.3044
A2ld1	83.3744	14.548	34.6985	23.7638	33.4651	34.0582
A2m	0.0383909	0.0807991	4.72699	1.05006	11.0762	9.33231
A330021E22Rik	0.0496611	0.0305633	0.571661	56.2309	1.10054	1.71655
A330023F24Rik	0.445002	0.185247	1.72698	14.7209	3.67092	2.15029
A330035P11Rik	0.51777	0.0942111	0.120234	0.875363	0.149481	0.712233
A330040F15Rik	0.726346	0	1.40518	2.65055	2.19176	4.14896
A330049M08Rik	0	0.554772	0.40973	0.299887	19.4146	19.7845
A330050B17Rik	0.572499	0.43994	0.475015	0.767195	0.384118	1.06292
A330050F15Rik	0	0	4.74032	0.0213146	5.24537	2.52143
A330069E16Rik	0.120592	3.26965	1.07524	0.539516	0.0903412	0.329175
A330076H08Rik	0	0	0.331276	0.115978	1.1597	0.619592
A3galt2	0.0154535	0.0376722	0.217808	1.00526	1.02312	2.13887
A430005L14Rik	34.2976	31.9113	25.3258	8.22885	6.28635	6.72902
A430033K04Rik	0.900182	0.471598	2.34404	4.18115	1.44882	1.32979
A430078G23Rik	0.0157197	0.0583481	0	0.0977683	0.0671976	0.184467
A430084P05Rik	1.26081	0.187632	0.126388	0.742388	0.279353	0
A430089I19Rik	0	0	0	0	0	0
A430089I19Rik	0	0	0	0	0	0
A430089I19Rik	0	0	0	0	0	0
A430093F15Rik	0	0.169042	0	0	0	0.122165
A430105I19Rik	0.330759	6.34316	2.84352	1.8272	2.66465	3.92143
A430107O13Rik	8.24841	4.66549	1.71299	10.5896	3.20653	4.43943
A430110N23Rik	0.060346	2.22016	1.23824	0.927983	0.772045	1.54675
A4galt	0.180736	2.9246	2.0239	4.5877	22.2507	18.9868
A4gnt	0.03464	0	0.0434291	0.199567	0	0
A530013C23Rik	0.100827	1.01395	0.419454	0.402263	0.0369726	0
A530016L24Rik	0	4.82455	1.13337	0.621932	0.210104	0.380852
A530023O14Rik	0.0463362	0.0383654	0.0437252	0.0356049	0	0.0787145
A530032D15Rik	0.158375	0.0632787	0.0570508	0.147439	0.0909515	0.0433421
A530053G22Rik	0	0	0	0	0	0
A530054K11Rik	0.373674	0.135718	0.184995	1.40771	1.04679	0.795787
A530058N18Rik	0	0	0.87331	0	0.764916	0.198294
A530064D06Rik	0	0	0	0.0184494	0	0.196828
A530088E08Rik	0	0.0360921	0.285659	0.313852	0.129584	0
A530098C11Rik	0	58.3876	16.6993	0.52914	0.0681897	0.297906
A530099J19Rik	0.0317925	0.0787336	0.0451741	0.124656	0	0.0761429
A630001G21Rik	0.20633	0.13597	0	0.401837	0.0660489	0.183993
A630007B06Rik	1.19792	2.34789	2.08817	11.9956	17.439	15.0731
A630010A05Rik	0	0	0	0	0	0
A630033H20Rik	0.0708074	0.105268	0.0423299	0.197657	0.0530083	0.642313
A630055G03Rik	0.0122509	0.851592	0.403902	0.338957	0	0.0347168
A630066F11Rik	3.40892	3.04504	4.55947	6.24371	1.27148	2.04091
A630072M18Rik	0.742618	0.446642	1.22131	2.83307	0.923829	1.7216
A630073D07Rik	0	0	0	2.5637	0	0
A630075F10Rik	0.0267531	0.0327113	0.199253	0.731102	0.956646	0.649265
A630089N07Rik	0.0807354	0.0942334	0.0844794	0.0658505	0.159339	0.107873
A630095E13Rik	52.1026	372.325	101.38	0	0	0
A730008H23Rik	7.60627	2.32124	8.60046	15.3117	5.00915	2.31474
A730011L01Rik	1.0828	1.33038	7.27055	5.67266	4.95618	5.24719
A730017C20Rik	0	0.0325432	10.2252	0.0475769	7.95318	7.92247
A730017L22Rik	0.763049	0.13928	0.348433	3.677	0.875682	1.13114
A730018C14Rik	0	0	0	0	0	0
A730020M07Rik	0	0.176002	0.413699	0.142128	0	0.158439
A730037C10Rik	0	0	0	0.0396185	0	0
A730069N07Rik	0.0240662	0.141983	0.201908	0.624101	1.58415	1.32034
A830007P12Rik	1.72404	2.15303	1.80195	9.82896	0.64374	1.20642
A830010M20Rik	0.165204	0.704777	4.39114	16.0469	7.23713	5.91198
A830018L16Rik	0	0.0369551	1.83811	12.8683	18.8114	10.4431
A830080D01Rik	0.597737	0.350571	0.437689	4.1888	2.54795	2.4976
A830082N09Rik	0.122366	0.18865	0.169439	1.39846	1.22735	2.51492
A830093I24Rik	0.126873	0.201152	0.308882	0.336709	0.306202	0.0782719
A930001N09Rik	2.76598	1.67261	1.864	20.2679	17.77	14.905
A930003A15Rik	0	10.5606	3.42853	0.0512805	0.342986	0
A930003O13Rik	0	0	0.247543	0.0749423	0.387279	0.500401
A930004D18Rik	0.17323	0.263339	0.918128	0.519475	3.1622	1.52471
A930005H10Rik	4.21088	16.2088	9.29092	8.80161	7.84986	12.5197
A930005I04Rik	0.0360722	0.0216547	0.704436	0.975434	0.360121	0.730449
A930007I19Rik	0.0202614	0.0754192	0.0541365	0.491785	0.0663899	0
A930011G23Rik	0.0128547	0	0.264093	0.0255023	0.060264	0.333523
A930012L18Rik	0.0626164	0.025896	0.380091	3.21584	1.19982	1.17288
A930013F10Rik	0.0760772	0.0468344	0.249297	1.61738	0.47693	0.253474
A930015D03Rik	1.24231	0.694138	2.47706	7.67562	7.30211	7.46491
A930017M01Rik	0.0270222	0.0166524	2.07248	0.777415	1.54795	0.505806
A930018P22Rik	0.0900294	0.102805	0.190117	0	0.149118	0
A930038C07Rik	0.0167748	0.061208	1.25201	1.34854	2.72264	2.15454
AA387883	0	0	0.286508	0.0865285	0.0879619	0.824879
AA388235	0.0116351	0.455046	0.152589	0	0	0
AA408296	1.71344	1.55219	2.84117	3.09203	2.85941	2.4398
AA415398	1.34577	0.686047	0.997703	2.17271	0.712654	1.04544
AA465934	1.52003	2.58513	7.40826	12.4167	3.68486	2.76701
AA467197	0.0990203	0.584514	0	0.760227	0	1.82079e-07
AA474331	1.00967	1.14157	1.10504	5.1398	2.50176	2.23228
AA543186	0.289763	0.0648759	0.06718	1.23203	0.0867455	0.383118
AA545190	0	0	0	0	0	0
AA619741	0	0.000615538	0	0	0	0
AA792892	0	0	0	0	0	0
AA881470	3.81765	2.99799	6.64379	5.54547	7.18168	6.51634
AA960436	6.19849	4.62941	6.61531	9.26103	4.0607	5.39891
AA986860	1.21897	0.2301	1.51644	0.6868	2.29827	1.49827
Aaas	5.14886	5.12099	9.25592	5.02943	5.40792	6.2957
Aacs	29.3712	6.85499	20.1759	21.1411	36.8339	57.762
Aadac	437.433	0	8.81591	0	0	0
Aadacl2	0	0	0	0	0	0
Aadacl3	0	0	0	0	0	0
Aadat	42.4503	0	1.02192	0.0754195	0.0766832	0.0920775
Aagab	10.9128	10.5317	22.3172	22.1641	16.8133	19.431
Aak1	0.848398	0.890688	14.8849	10.2046	27.1648	18.2761
Aamp	99.7367	79.6729	130.326	55.0979	53.4283	58.4136
Aanat	0	0	0	1.09144	0.19619	0.24577
Aard	1.13079	0.0981893	3.2353	2.37169	8.57025	1.57364
Aars	62.6493	26.6987	58.484	40.4162	43.1379	38.1659
Aars2	5.89443	6.55596	11.7297	6.96837	4.65414	7.11888
Aarsd1	23.661	34.3074	45.5722	23.034	22.0584	22.6287
Aasdh	0.996092	1.56779	1.53391	3.60793	1.77308	2.11125
Aasdhppt	9.34842	7.28283	5.42932	11.9294	8.59628	7.49634
Aass	74.0332	0.142724	3.08624	4.4992	1.28013	0.826199
Aatf	11.4052	6.74738	7.72537	9.23647	7.16368	11.2607
Aatk	0.491327	2.29303	85.4218	22.9456	116.982	110.833
AB056442	1.22689	0	0.00255496	0.0330339	0	0
AB099516	2.13458e-08	4.32305e-08	6.38277e-08	0.119908	0.160166	0.853047
AB124611	2.31282	1.52322	0.952635	3.03678	0.867628	1.15742
Abat	57.0885	0.86834	74.7397	10.5163	19.6602	27.9275
Abca1	17.8959	2.13291	2.97362	13.7273	22.261	19.3656
Abca12	0	0.0238844	0.0124173	0.121579	0.00713367	0.0438042
Abca13	0	0.00942843	0.0135065	95.2669	0.312711	0.0896743
Abca14	0.0163779	0	0.0218637	0.253938	0	0
Abca15	0	0	0	0	0	0
Abca16	0	0	0	0	0	0
Abca17	0.0322112	0.00292778	0.0942599	0.0936648	0.0631766	0.0400412
Abca2	7.37362	4.05208	65.2556	41.7431	100.325	75.9161
Abca3	13.1825	2.49358	19.9687	67.773	50.4287	41.0061
Abca4	0.0258037	0.235032	0.988517	0.59613	0.19091	0.17438
Abca5	0.856103	1.29928	2.76452	55.1547	21.6944	21.9405
Abca6	40.1683	0.630979	1.18698	1.97306	36.2033	21.8317
Abca7	1.61649	2.0723	7.47728	24.276	35.7699	27.2112
Abca8a	23.3347	6.72937	2.45936	9.04787	69.5655	69.7805
Abca8b	14.6214	2.04905	1.73567	1.43786	16.2603	16.1256
Abca9	0.52485	1.73253	1.56805	4.3574	7.50252	14.4987
Abcb10	8.56179	8.60776	8.54132	9.01039	7.54031	6.75215
Abcb11	130.548	0	2.60249	0.0249234	0.0252306	0
Abcb1a	1.31141	2.52905	4.74107	7.93694	7.94837	8.69209
Abcb1b	0.500594	4.9777	1.64177	0.50947	0.721888	1.28729
Abcb4	73.4858	41.7665	12.1083	0.571147	1.54025	2.26717
Abcb5	0.0105614	0.114622	0.0799368	0.0204186	0	0
Abcb6	61.4499	23.3132	16.0921	16.3723	9.12822	9.64451
Abcb7	9.86209	7.91469	4.07534	8.9823	11.0592	9.30225
Abcb8	13.2604	15.2615	20.698	14.0372	16.2563	16.0267
Abcb9	0.957672	2.96434	23.0656	4.79223	15.7915	16.8644
Abcc1	0.377585	7.10506	4.67321	59.9714	5.39209	5.94399
Abcc10	1.45572	0.550846	2.61072	16.8779	2.98365	2.61764
Abcc12	0.458172	0.0355274	0.256449	0.0698412	0.14937	0.161001
Abcc2	82.6659	0.0199792	2.05848	0.0383324	0	0
Abcc3	142.852	0.182648	4.037	41.5901	1.18464	0.844463
Abcc4	1.54773	2.93352	3.59343	41.3208	5.1792	7.49415
Abcc5	0.385098	7.92183	24.5746	73.1817	46.2748	35.7867
Abcc6	33.8422	0.0273562	1.17847	0.223013	0.0149626	0.0699065
Abcc8	0	0.721978	10.0257	0.278806	5.71452	3.23712
Abcc9	3.11511	27.1951	7.92173	2.48301	0.898366	1.66305
Abcd1	9.63984	11.4466	6.57862	8.59059	5.12566	5.97381
Abcd2	3.66767	8.65292	4.85916	36.477	8.2196	4.92495
Abcd3	234.063	17.0908	22.2519	47.8117	33.6608	34.1335
Abcd4	4.15799	4.44825	6.32921	2.78787	4.75489	6.26533
Abce1	19.7968	13.4575	9.06877	17.5808	27.1888	35.0328
Abcf1	29.1467	38.9908	38.3529	26.5354	28.4977	30.2842
Abcf2	24.836	94.1982	74.7182	23.1292	34.8363	37.8101
Abcf3	18.6436	24.3968	28.1966	16.2579	21.3578	20.4004
Abcg1	1.54283	0.757914	11.1675	64.2696	27.8505	25.344
Abcg2	37.3959	9.05178	6.66593	4.1159	20.7036	22.9403
Abcg3	0.659607	0.166131	0.194793	0.242429	0.0208889	0.227314
Abcg4	0	0.400021	24.4279	1.54709	21.7475	14.0236
Abcg5	52.5546	0	1.0827	0.102618	0	0
Abcg8	46.1146	0	1.17208	0.0111079	0	0.0507851
Abhd1	0.485887	0	0.46612	3.1297	2.59616	3.70666
Abhd10	1.91499	5.75543	6.62456	6.07543	16.1191	18.6762
Abhd11	35.149	38.366	32.5413	13.5157	17.1787	19.6276
Abhd12	19.2104	25.9784	205.392	62.1961	160.322	86.7986
Abhd12b	0.0509299	0	0.254402	0.092306	0	0
Abhd13	4.36441	2.77215	3.39991	12.9697	5.91006	8.02368
Abhd14a	8.85278	13.5421	20.2082	13.7749	11.3004	17.5592
Abhd14b	193.993	6.48211	14.8231	72.713	9.10973	9.50021
Abhd15	12.3351	0.625406	0.828277	0.856559	2.20883	1.7121
Abhd16a	26.8753	77.0725	86.6735	141.352	43.3985	43.7266
Abhd16b	0.0320614	0	0	4.18197	0.186692	0.355219
Abhd2	8.82624	2.53469	12.6442	91.1298	89.3662	73.3816
Abhd3	39.5361	0.554951	21.9086	43.3942	14.7768	12.5504
Abhd4	31.3214	21.6371	45.7807	19.8847	57.5399	60.2579
Abhd5	11.6399	19.4884	8.92922	7.7221	10.6801	19.8282
Abhd6	20.5968	4.03442	20.5603	20.7706	17.9361	19.1076
Abhd8	4.37693	19.4678	222.651	22.4061	48.49	45.7996
Abi1	13.7667	8.27953	23.2712	29.8176	27.5512	39.0024
Abi2	0.646614	0.925522	7.05289	10.5417	24.7237	21.4987
Abi3	4.50754	82.2073	37.8185	14.9147	15.8406	10.466
Abi3bp	0.877395	3.73885	2.49738	11.5944	2.27654	7.0262
Abl1	4.00825	6.71307	11.1058	19.1144	9.66752	9.97196
Abl2	1.02348	1.45679	4.32207	7.75213	11.4361	8.69167
Ablim1	3.39697	7.65415	20.9996	8.25183	38.8682	29.3003
Ablim2	0.0982122	2.31182	4.67385	1.40022	1.66426	0.684662
Ablim3	6.12013	7.82311	11.9236	1.65207	12.0714	13.0112
Abo	0.117331	0.10619	0	0.699526	0.122147	0
Abp1	0.0330149	0.0478722	0.127923	0.282057	0	0
Abpa	0	0	0	2.34751	0	0
Abpb	0	0	0	4.64744	0	0
Abpd	0	0	0	0	0	0
Abpe	0	0	0	0.75056	0	0
Abpg	0	0	0	0	0	0
Abpz	0	0	0	1.48857	0	0
Abr	0.928634	3.15323	85.3237	60.1668	48.0766	60.7143
Abra	0	121.639	33.3153	0.237538	0.0751388	1.42638
Abt1	2.98797	3.40369	5.36823	3.80866	2.69677	3.30392
Abtb1	21.8088	28.5562	31.699	13.3914	27.667	22.4948
Abtb2	3.38841	2.96466	6.49366	3.263	15.8213	22.6517
Acaa1a	219.638	43.0798	56.8315	47.5175	18.2313	25.8717
Acaa1b	1095.8	5.78621	35.8928	7.60383	2.60539	2.97097
Acaa2	844.687	138.477	68.8827	38.793	37.2232	42.5726
Acaca	30.1819	9.00266	11.2433	10.3055	30.7033	31.4119
Acacb	13.9625	33.1446	9.43238	2.05441	3.28496	2.4822
Acad10	8.47458	1.86142	1.4681	5.4443	1.48467	1.20352
Acad11	121.337	17.2949	12.8934	46.5941	7.28935	8.35074
Acad8	21.5532	15.479	11.7358	21.1283	10.433	12.347
Acad9	9.53621	12.4177	11.2992	14.8215	9.6153	11.7792
Acadl	118.914	161.016	60.6807	24.652	65.8252	88.5519
Acadm	191.659	163.308	52.8119	58.1055	31.1516	32.0399
Acads	126.019	71.4728	26.7035	9.13241	8.42718	10.5148
Acadsb	38.7369	36.3701	20.0513	23.4583	15.371	18.0976
Acadvl	244.964	168.197	71.7215	36.2825	42.0915	42.2669
Acan	0	0.204604	1.6341	0.952519	0.35002	0.199141
Acap1	0.379302	0.707683	0.0886155	2.28398	0.132694	0.511356
Acap2	2.47975	1.42803	2.39656	20.1388	11.3677	15.9182
Acap3	1.42037	3.71437	32.5716	10.0258	15.4356	18.7976
Acat1	99.9365	52.7998	33.3991	20.792	25.3455	30.4049
Acat2	46.8539	6.46438	17.9437	9.91559	37.0199	77.0399
Acat3	128.949	26.0192	26.5104	12.5914	30.0657	34.1032
Acbd3	6.35545	4.47499	6.55363	20.5493	20.6388	26.864
Acbd4	19.1048	12.6726	20.3086	10.2317	14.9904	18.0742
Acbd5	58.3741	5.59286	7.92066	38.2179	34.2353	38.3639
Acbd6	28.5629	45.1568	50.4596	12.5396	15.8942	14.0398
Acbd7	0	2.11804	0.298597	64.507	1.79867	0.806415
Accn1	0	0.02107	22.4199	0.612615	18.9708	27.7586
Accn2	0.430498	0.360223	32.9119	22.7379	34.7408	17.5755
Accn3	0	0.0314245	0.0594597	1.6955	81.3368	28.4735
Accn4	0	0	13.1188	0.0994525	0.482418	0.118381
Accn5	3.22202	0	0.130411	0	0	0
Accs	1.55344	1.06487	1.2547	2.03416	2.51931	1.9749
Accsl	0	0.0253014	0	0	0.182862	0.316542
Acd	11.0351	5.66878	28.5238	10.1473	10.8342	8.52249
Ace	0.599253	12.7185	13.375	9.67558	3.12622	6.97122
Ace2	0.220418	0.239249	0.125421	1.28419	0.383187	0.235922
Acer1	0	0.0536388	0	0.0660625	0	0
Acer2	3.46554	1.24269	1.31682	5.35004	2.43746	1.43723
Acer3	3.20765	0.785907	1.85127	3.24988	6.54873	6.98144
Ache	0.236678	16.7574	61.2411	2.12787	47.2829	29.9774
Acin1	3.39521	2.82802	6.78951	18.993	8.65438	7.40244
Acly	121.174	40.8586	63.9424	35.227	107.267	149.315
Acmsd	2.51343	0	0.0486222	0.110877	0.23083	0
Acn9	11.1158	29.5743	8.10634	6.80982	10.3457	10.0484
Acnat1	7.21758	0	0.194243	5.33372	0.0595757	0.0361651
Acnat2	26.3445	0	0.602616	2.59289	0.0373541	0
Aco1	67.1834	7.21673	11.2197	19.044	8.96165	13.0095
Aco2	96.4507	828.397	449.637	103.621	122.547	105.633
Acot1	47.6039	3.50735	12.7585	4.84945	6.02421	5.44088
Acot10	0.0810653	0.846626	0.413427	0.429721	0.613752	0.472778
Acot11	0.641903	1.39633	9.71237	2.62053	2.64342	3.52274
Acot12	54.46	0.0176958	1.23816	2.46028	0.135457	0.334542
Acot13	96.6178	170.704	89.7978	29.5701	44.127	47.8005
Acot2	4.52986	4.68156	3.52709	3.57029	3.40737	3.92327
Acot3	9.23768	0.00428964	1.11644	0.00593049	0.00751699	0.0062754
Acot4	13.9527	0.120479	0.803106	0.0912173	0.0711493	0.0682527
Acot5	0.824132	0.11421	2.58194	0.0927457	0.147585	0.0499485
Acot6	0.911155	1.45353	1.96205	1.55783	2.78584	2.03263
Acot7	22.6894	21.1034	331.155	4.51124	240.978	296.813
Acot8	18.6839	10.7282	21.9444	15.8357	9.44207	10.0937
Acot9	2.58685	21.7181	10.4164	5.30633	20.8458	19.6121
Acox1	532.084	34.3081	62.0076	60.3681	50.4602	45.5664
Acox2	119.986	0.166079	2.21534	9.7506	0.0266409	0
Acox3	6.75398	5.75	9.59907	8.05617	16.0398	13.9241
Acoxl	0.0158514	0.075954	0.148787	0.179514	0	0
Acp1	13.4358	8.03335	8.28308	7.16739	9.16512	16.0134
Acp2	8.4773	3.76494	10.8041	31.3054	15.923	17.9409
Acp5	129.588	28.9094	9.66853	39.4644	0.557289	3.26889
Acp6	26.7486	16.4594	8.75934	4.85427	3.37981	3.23054
Acpl2	2.35887	1.00881	6.53051	4.00931	2.40651	1.86277
Acpp	0.50595	0.0713201	0.151176	18.2473	42.4496	102.711
Acpt	0	0	0	0.036601	0.121611	0
Acr	0	0.0430147	0.0830921	0.922201	0.508941	0.349687
Acrbp	0.756052	0.268963	5.2612	5.16105	1.4731	1.40659
Acrv1	0	0	0	0	0	0
Acsbg1	0.0737513	0.660314	100.927	23.9475	31.4679	37.5835
Acsbg2	0	0	0	0.0530395	0	0
Acsf2	79.7727	1.50685	7.78935	18.8856	4.78637	5.97856
Acsf3	16.9171	8.13216	14.615	17.4911	8.95186	8.4981
Acsl1	319.808	71.0136	34.3117	29.5467	14.1667	18.5119
Acsl3	5.69903	8.75	24.1244	22.2334	16.6177	20.3114
Acsl4	9.16672	4.28347	4.44601	15.8941	19.7163	24.4928
Acsl5	121.04	3.81115	12.7873	22.8158	16.3754	18.1095
Acsl6	0.0193344	14.634	61.1392	143.822	64.3029	26.9825
Acsm1	301.864	0.027527	5.79386	1.44185	0	0
Acsm2	0.343778	0	0.0168472	0.0251267	0	0
Acsm3	25.7979	0.976781	0.991484	20.2126	0.0723811	0.110031
Acsm4	0	0	0	220.239	0.532798	0
Acsm5	61.0844	0.221028	2.13796	0	0.0240182	0
Acss1	0.0976395	11.9568	7.34736	62.8895	4.16462	5.57637
Acss2	82.1344	23.7092	28.9576	65.4355	30.8588	31.1665
Acss3	4.04591	1.60414	1.01329	20.4223	2.38034	1.19765
Acta1	7.08192	0	14349	0.51847	0.555762	194.817
Acta2	7.91111	112.556	38.965	122.195	6.0779	21.8102
Actb	236.374	494.037	340.584	957.125	898.959	1242.79
Actbl2	0	0.947552	0.181808	0	0.129701	0
Actc1	0.316564	1084.16	271.588	0.063346	0	0.790456
Actg1	34.1599	43.8642	229.185	47.151	115.784	105.842
Actg2	3.42553	52.3981	5.16709	9.77418	1.1199	2.79591
Actl6a	13.9128	14.4051	7.97518	18.9616	5.89649	8.64894
Actl6b	0	0.0400948	52.5868	1.30044	12.7497	17.1271
Actl7a	0	0	0	0.16315	0.17912	0.252519
Actl7b	0	0.0493656	0	0.0306458	0.0534792	0.0536758
Actl9	0.0418227	0	0.192796	0	0.113833	0
Actn1	14.342	5.99955	22.7735	48.2043	9.29705	15.1273
Actn2	0.0656781	260.954	65.5674	0.0763885	0.576574	4.70894
Actn3	0.618629	5833.08	1435.8	0.750668	0.6218	14.2454
Actn4	57.8669	21.3832	47.8654	69.8182	35.9338	49.7409
Actr10	10.2562	17.5241	23.2838	18.3147	25.1263	26.5108
Actr1a	28.3313	50.5124	120.786	34.2914	149.182	158.637
Actr1b	33.1859	66.6626	148.406	92.5092	102.197	114.866
Actr2	29.9615	7.71187	21.9908	71.2815	121.086	141.415
Actr3	36.0274	25.0482	48.6144	63.6502	95.1543	124.119
Actr3b	0.0553827	5.46327	30.844	15.6772	37.7159	29.3451
Actr5	3.74548	1.77177	3.46256	4.33399	2.15005	1.07908
Actr6	5.60496	3.46448	2.34667	5.18441	6.82726	6.10658
Actr8	14.4495	22.9596	25.2408	21.2415	20.8526	21.1979
Actrt1	0	0	0	0	0	0
Actrt2	0	0.785085	0.343109	0.0309535	0	0
Acvr1	5.28847	5.37864	11.5295	12.3316	9.59601	8.45479
Acvr1b	3.00296	16.4033	38.3993	27.4207	20.7018	17.2428
Acvr1c	0.00460991	0.145584	0.264621	0.053455	0.225465	0.110952
Acvr2a	4.07657	2.7119	2.42063	12.8726	8.68662	12.1037
Acvr2b	1.40384	2.25384	1.95417	9.25165	2.84357	2.81811
Acvrl1	1.28656	6.55404	7.36944	3.8874	4.21504	7.07357
Acy1	31.5081	7.53428	10.6133	52.5866	4.64376	6.9348
Acy3	47.0455	2.33274	4.37643	3.52294	1.75793	1.64172
Acyp1	9.67847	53.4355	33.5961	9.63533	16.8755	11.9782
Acyp2	3.56659	246.938	95.6661	11.2393	36.1971	52.7387
Ada	1.92395	0.588642	0.854535	3.11908	0.992932	3.56732
Adad1	0	0	0	0	0	0
Adad2	0	0.111971	0	0	0	0
Adal	4.06345	6.07656	4.75098	6.09728	4.95284	4.6258
Adam10	6.89439	4.6077	6.93183	26.9859	63.9169	79.8953
Adam11	2.92657	0.161221	46.7519	0.70991	48.9749	43.0786
Adam12	0.0291776	0.226827	0.242402	3.01215	0.754149	0.963883
Adam15	1.56918	10.7313	35.0338	16.8252	35.2525	32.1403
Adam17	7.6175	3.85814	2.69882	11.3676	6.92157	15.5562
Adam18	0	0	0.0955066	0	0	0
Adam19	0.0894834	0.684889	3.03334	7.6149	18.2165	20.7968
Adam1a	0.123045	0.188548	1.10543	6.37922	1.29762	1.64018
Adam1b	0.00436313	0.00420855	0.0774848	1.14837	0.189325	0.0994693
Adam2	0	0	0	0.0163193	0	0
Adam21	0.0163851	0	0.0855862	0.190497	0.121611	0.338976
Adam22	0.00914292	0.039827	6.63848	25.5513	83.8918	55.6844
Adam23	2.2138	0.412867	24.6305	23.6677	218.422	103.624
Adam24	0	0	0	0	0	0.0570788
Adam25	0	0	0	0	0	0
Adam26a	0	0	0	0	0	0
Adam26b	0	0	0	0	0	0
Adam28	0	0.0762662	0	79.9338	0.331703	0.0424907
Adam29	0	0	0	0	0	0
Adam3	0	0	0.0395834	0	0	0
Adam30	0	0	0	0.164743	0	0
Adam32	0.0354252	0.0653539	0	0.0526545	0.298604	0.309182
Adam33	0.035747	0.566024	0.692712	0.172183	0.436166	1.12793
Adam34	0	0	0	0	0	0
Adam39	0	0	0	0	0	0
Adam4	0.0591927	0.0131406	0.0272035	2.12888	0.517174	0.214601
Adam5	0	0.0768928	0.0405805	0.247407	0.634401	0.886373
Adam6a	0	0	0	0.0369889	0	0
Adam6b	0	0.0259621	0	0.0474454	0	0
Adam7	0.0459806	1.00971	0.181811	0.0702684	0.0515636	0
Adam8	0.0492664	0.491164	0.729712	8.85483	2.00866	4.71087
Adam9	20.0059	15.8727	9.582	29.0877	40.2297	33.2107
Adamdec1	0.656821	0.0206285	0.0445363	14.6643	0.100921	0.115255
Adamts1	1.94947	4.48163	3.56385	4.68494	6.60497	10.5858
Adamts10	0.595929	2.14725	7.62947	3.1822	1.99351	3.28944
Adamts12	0.0136815	0.41388	0.0496252	0.714854	0.469442	1.43285
Adamts13	0.850001	0.0133289	0.0973664	0.0787253	0.0722701	0
Adamts14	0.159964	0.248326	0.170841	0.647253	0.573471	1.21624
Adamts15	0.120216	0.557607	1.98878	5.58735	4.18666	5.78236
Adamts16	0.00934845	0.0559325	0.496701	0.119608	0.301061	0.130804
Adamts17	0	0.0854396	0.658931	1.38083	0.623395	1.59855
Adamts18	0	0	0.239944	0.647736	0.216765	0.200096
Adamts19	0.00947807	0.0234394	0.0917952	0	0	0.0895672
Adamts2	1.57212	5.15916	7.15199	8.54361	3.63112	11.0281
Adamts20	0	1.51661	1.07549	0.594199	3.18759	8.04869
Adamts3	0.028072	0.109749	1.44072	0.455766	3.29459	2.48874
Adamts4	0.0149369	0.0176944	5.93396	0.634218	1.72863	2.38046
Adamts5	0.180787	1.37809	0.424413	2.74302	19.9521	15.9317
Adamts6	0.0935392	0.0530651	0.156682	0.853325	0.730814	0.654419
Adamts7	1.05443	0.200136	0.107297	0.668944	0.848361	2.02663
Adamts8	0.0144548	0.943135	1.17887	0.373638	0.909748	1.73878
Adamts9	0.109541	0.693111	0.425176	3.46528	1.79259	4.77784
Adamtsl1	0.0882698	0.777429	1.15962	2.37976	2.01026	3.90479
Adamtsl2	1.53673	0.697392	1.61101	2.45654	0.7563	1.64772
Adamtsl3	0.0175579	0.44185	0.294792	2.39956	2.22427	2.37519
Adamtsl4	1.20581	7.18413	5.26914	2.24297	3.20387	4.12348
Adamtsl5	0.33553	13.0274	6.87519	3.61303	19.2817	18.2355
Adap1	0.429456	1.93893	110.641	3.56564	82.2159	70.1535
Adap2	8.21907	0.979515	1.8845	1.16778	1.2111	1.78996
Adar	4.37531	1.51609	34.2738	11.6775	13.4571	15.4016
Adarb1	2.89454	1.94915	40.1514	8.33697	29.4093	13.3245
Adarb2	0	0.0188283	1.17744	0.0454785	0.483558	0.0599039
Adat1	1.55067	0.866894	1.54305	2.86718	3.5709	3.11085
Adat2	3.33517	4.21518	5.92981	4.95233	3.96476	3.5928
Adat3	0.690277	0.475261	1.66318	7.0504	1.81065	1.40256
Adc	0.931124	1.44193	23.071	6.43673	34.9889	45.5746
Adck1	7.80374	13.2654	17.3411	5.23579	8.91479	8.2335
Adck2	4.18138	2.4676	7.54955	8.5791	6.55216	5.79493
Adck3	83.2343	243.734	73.4921	4.69994	9.41071	7.1491
Adck4	10.6146	3.26079	13.743	20.3366	6.51831	6.60882
Adck5	18.6658	4.42114	9.08089	9.40133	4.55508	4.09716
Adcy1	0.0427669	0.173068	65.9937	2.09007	20.282	24.6759
Adcy10	0	0.039942	0.0813191	0.219961	0.0467581	0.0225069
Adcy2	0.0465458	12.8934	31.5845	3.60074	13.7746	6.58569
Adcy3	0.220172	0.566006	14.9681	429.452	6.90739	6.11188
Adcy4	1.83427	3.60288	2.88722	1.71204	0.395601	1.01783
Adcy5	0.322918	0.700018	54.1707	7.84491	12.9496	18.686
Adcy6	3.70695	4.83782	10.0131	18.0758	9.36271	11.3898
Adcy7	0.357805	0.963607	1.25253	3.32363	3.65441	3.8695
Adcy8	0	0.0583356	7.89717	0.0404392	2.63152	4.52343
Adcy9	4.4934	8.62939	17.6051	4.85992	22.2598	12.7488
Adcyap1	0	0	7.8013	0.198371	20.0828	47.2856
Adcyap1r1	0.184716	0.702417	34.9803	0.0940025	3.68503	1.51394
Add1	10.5846	24.3325	101.772	56.1354	92.7931	91.8713
Add2	0	0.432385	38.6807	39.2467	52.3768	66.1735
Add3	3.39763	7.58681	22.9964	13.8651	21.0147	34.9804
Adh1	2807.05	56.8238	74.8439	320.526	3.77695	3.54466
Adh4	56.786	0	0.821149	0	0	0
Adh5	280.141	47.9797	45.9188	75.9579	29.047	29.4692
Adh6a	2.49386e-06	0.0481816	0	0	0	0.102751
Adh6-ps1	6.76509	0.0188665	0.159565	0.0660165	0	0
Adh7	3.69844	0.821492	0.23989	13.5665	0.141427	0.562394
Adhfe1	25.6003	14.4673	8.12099	8.02468	1.25465	0.945619
Adi1	93.762	49.528	36.2374	111.769	15.7613	18.3461
Adig	0	18.8636	3.36919	2.22442	0	0.540831
Adipoq	0.349884	99.8683	24.8668	0.070939	0	2.34433
Adipor1	73.7947	298.304	127.215	326.053	88.1895	119.109
Adipor2	163.133	55.9139	38.2334	46.7267	33.9443	30.227
Adk	371.213	30.1148	36.4498	11.7354	54.6969	120.324
Adm	1.14763	2.4623	1.60624	1.40978	1.32031	1.98336
Adm2	0.296014	0.142339	0	0	0	0.30071
Adnp	10.6201	5.53784	16.2313	42.12	32.4878	26.4193
Adnp2	2.118	1.0197	4.40331	9.27463	7.50723	7.22366
Ado	4.61869	8.39413	11.9213	14.693	19.3945	13.9608
Adora1	7.51099	22.8231	53.864	1.56625	21.8661	17.5935
Adora2a	0.694535	1.55609	16.7338	0.770403	2.23747	2.32366
Adora2b	0	0.317187	2.30009	9.49948	0.695392	2.17417
Adora3	0	0.105478	0.0700439	0.110115	0	0.0717969
Adpgk	8.49355	6.34994	8.44598	8.37699	8.44272	8.45475
Adprh	6.09647	42.1786	91.5118	32.2026	63.3912	57.1816
Adprhl1	0	23.1722	6.20012	0.436068	1.39978	2.16872
Adprhl2	12.077	10.7614	27.1623	16.4091	11.4131	9.32573
Adra1a	0.818143	0.221978	1.35189	0.302872	2.25114	0.438983
Adra1b	15.1517	0.268574	11.228	0.296446	1.00088	0.709717
Adra1d	0.0534255	0.535308	19.138	0.666214	1.05099	1.68278
Adra2a	0.0152609	0.428834	9.32273	9.94007	2.32855	6.3814
Adra2b	0.814294	0.161488	0.281533	0	0.214375	0.355355
Adra2c	0	0.271631	11.2564	16.4825	11.5297	4.87568
Adrb1	0.634524	0.174159	11.2495	4.4061	1.22781	0.490782
Adrb2	0.534005	7.71991	2.43502	6.35169	2.78862	3.39595
Adrb3	0.319467	2.02105	0.861066	0.116927	0.0298454	0.275045
Adrbk1	12.5896	28.1186	94.5238	12.1045	55.9038	85.5128
Adrbk2	0.489958	0.684733	7.94914	5.85087	5.0455	7.19256
Adrm1	99.106	147.187	107.4	44.5855	59.0821	47.7365
Adsl	9.30921	93.923	35.534	17.0309	9.21907	12.7377
Adss	21.2951	4.3079	15.2801	33.0902	39.3665	36.2964
Adssl1	18.1234	825.416	214.672	3.768	3.34127	5.03651
Aebp1	0.64664	30.8272	17.3369	25.0419	10.0335	15.8702
Aebp2	8.62097	9.1425	13.3705	59.0626	26.0588	29.2686
Aen	5.96842	19.9633	14.248	4.80524	12.4387	21.0455
Aes	489.392	869.422	783.632	154.697	295.554	272.684
AF067063	0	0	0	0	0	0
AF251705	4.01117	0.588901	2.35831	1.64565	0.698161	1.48318
AF357355	0	1044.19	2022.68	0	0	0
AF357359	0	0	0	0	0	0
AF366264	0.0154671	0	0	0.0936665	0.0235913	0.0497263
AF529169	0	0.0121615	0.79624	0.528479	12.0772	9.52341
Afap1	0.112381	0.546863	1.20594	16.8428	7.23	9.81406
Afap1l1	1.48679	24.827	12.9892	2.19466	3.37657	3.98491
Afap1l2	0.197007	0.66321	5.50549	4.41006	9.79249	20.8453
Aff1	3.83102	4.00349	3.50431	19.4954	12.0336	8.44459
Aff2	0.00869671	0.0202013	1.64652	0.257402	2.45766	3.79345
Aff3	0.0648119	0.517966	7.29112	19.1611	13.9649	14.9662
Aff4	6.76304	4.7403	7.53711	49.6658	34.7239	30.9486
Afg3l1	18.0506	16.7186	12.8702	12.0395	6.70977	8.03062
Afg3l2	32.9052	27.2313	30.1528	15.3472	33.6092	28.3563
Afm	117.205	0	2.27577	0	0	0.0657426
Afmid	66.1612	2.17031	2.96203	1.56895	1.30958	1.08522
Afp	0.484845	0	0.0496087	0	0	0.11133
Aftph	10.4863	4.03448	7.15969	36.4642	20.3558	19.8978
Aga	18.656	15.6711	9.147	15.1723	10.8821	13.7623
Agap1	1.14782	1.24056	11.045	25.0534	19.1417	15.8551
Agap2	0.177138	0.6021	181.317	1.55072	14.3594	5.92427
Agap3	9.2053	14.1304	63.1754	19.1677	44.8717	43.6516
Agbl1	0	1.17546	0.509898	0.0335439	0.198289	0.327592
Agbl2	0.0125522	0.0463234	0.408485	4.0781	0.361961	0.0675891
Agbl3	0.528207	0.243407	0.604567	2.1694	0.689263	0.826758
Agbl4	0	0	2.32474	6.94843	2.67817	0.805844
Agbl5	2.20494	0.760094	3.38086	14.0968	2.39587	2.24359
Ager	0.0810728	0.142146	0.350871	0.951819	0.100731	0.591272
Agfg1	5.99033	8.70859	12.1024	22.0559	37.7489	46.8315
Agfg2	14.2912	3.32946	20.2524	8.0844	16.1187	21.1584
Aggf1	9.58678	6.92471	12.3506	17.3961	14.2971	16.1468
Agk	3.43159	2.92099	16.2429	5.04579	10.5485	12.7839
Agl	8.44849	108.276	32.3023	4.92638	24.8953	19.4492
Agmat	99.2859	0	3.64894	0.194949	0.228483	0.141247
Agpat1	3.13198	43.4677	76.0068	38.9201	57.2179	58.4858
Agpat2	172.887	33.5154	11.6496	11.629	5.7898	10.2204
Agpat3	72.8933	32.7645	98.2578	100.872	77.6752	60.5521
Agpat4	0.727185	2.95956	32.982	24.3973	27.1043	40.0609
Agpat5	3.76237	10.0134	13.4416	7.61519	11.3013	14.5808
Agpat6	58.7712	20.9612	31.988	23.3107	30.4783	31.0037
Agpat9	3.19155	1.93508	2.37677	20.6522	1.46507	1.35886
Agphd1	8.22435	0.0627107	0.587922	7.15865	1.25125	0.844728
Agps	2.18221	3.14598	3.0679	15.139	12.7138	19.3099
Agr2	0.833375	7.77519	1.569	195.01	0.633053	0
Agr3	0	0	0	7.5809	0	0
Agrn	4.53348	2.1761	22.4497	36.5412	20.097	25.415
Agrp	0.0948776	0.228954	0.86609	1.63455	0.131335	0.96871
Agt	628.035	13.4178	79.0325	1.91563	7.51976	3.32881
Agtpbp1	2.3533	10.2539	21.0378	55.0774	69.4952	84.6058
Agtr1a	30.8876	1.93741	1.23413	0.756824	4.38355	7.79893
Agtr1b	0.0407055	0.0277694	0.0685425	0	3.7166	2.08755
Agtr2	0	0.0375862	0.172692	0	0.186139	0.0874068
Agtrap	1.16922	3.37963	5.03849	16.6112	10.6681	15.2227
Agxt	133.097	0.0453195	2.7122	0	0	0
Agxt2	46.6529	0	0.966091	0.077857	0	0
Agxt2l1	101.574	0.0391628	10.6605	0.185878	1.03453	0.229159
Agxt2l2	7.93983	8.9394	4.60638	5.43253	2.24622	3.35097
Ahctf1	6.24467	2.14658	2.28169	12.4689	5.98261	5.39939
Ahcy	1272.24	57.8936	59.7638	16.7351	39.7706	52.9749
Ahcyl1	31.9106	8.25166	75.3499	65.9084	75.6597	70.1498
Ahcyl2	2.69267	2.96082	17.0607	34.2375	40.155	33.171
Ahdc1	2.24959	2.33473	14.9681	15.9408	10.5261	8.77411
Ahi1	0.187719	0.310326	31.3379	30.41	13.5708	10.9
Ahnak	2.02614	27.3213	7.00086	27.5902	107.866	129.847
Ahr	5.93932	0.280001	0.797174	8.55113	5.74242	11.8024
Ahrr	0	0.0233299	0.0477773	0.0954999	0.149946	0.504511
Ahsa1	98.4957	123.866	136.31	58.3438	98.954	116.723
Ahsa2	10.8646	8.30264	8.96697	21.9829	20.0976	24.965
Ahsg	8949.05	0.902029	198.801	0.990009	0.0475106	0.142771
AI118078	0.753501	1.3404	9.39585	1.92257	1.33174	1.6842
AI182371	93.737	0.0295709	1.81764	0	0.0383699	0
AI314180	15.8404	46.5019	16.0488	27.888	51.9559	44.0814
AI314831	0	0	0	0	0	0
AI314976	17.1467	14.2309	6.03939	14.976	6.73252	5.90133
AI316807	21.6537	52.184	37.9603	18.217	19.772	16.9425
AI317395	32.2381	3.85055	1.6428	1.02121	0.411328	0.622594
AI413582	4.3139	3.93674	61.2817	25.3706	50.632	105.992
AI414108	0	0.0120357	3.31775	5.74505	4.76901	4.34895
AI427809	0.0640098	0.0525988	0.0540374	0.300706	0.475541	0.437922
AI428936	1.1664	0.759045	1.82289	10.3595	5.68257	3.70912
AI429214	0.131926	0.10707	0.450755	3.28597	1.08108	1.04341
AI450353	0.196602	0.0790279	0.387172	1.74425	0.165739	0.727698
AI462493	41.6155	75.6212	45.5501	21.6917	19.6359	25.5499
AI464131	10.9809	23.4646	17.6732	4.169	11.1013	11.0464
AI467606	0.1888	1.81074	1.8145	1.74925	0.483446	0.656859
AI480653	0.800619	1.97807	8.81917	6.38796	4.74294	3.88486
AI504432	0.0275245	0.0512594	1.30368	0.816078	0.84167	0.551178
AI506816	0.0626115	0.332105	0.259101	0.070088	0.121109	0.114082
AI507597	7.07257	0	0.503173	0.577851	0	0.145725
AI593442	0	0	9.9573	0.0705925	47.1017	18.6292
AI597468	2.28229	2.01874	2.93818	11.0023	9.60213	10.0421
AI597479	3.01515	7.15077	8.13873	10.8181	10.7521	13.9306
AI646023	0.100823	0.36159	6.36933	6.07081	32.2095	40.3564
AI661453	9.5265	0.385151	0.374012	2.83464	0.0890678	0.101111
AI662270	0.322794	0.275276	0.261065	0.213757	0.104992	0.122929
AI747448	0.00214207	0	0	0	0	0
AI836003	0	0.027576	20.8438	27.4109	6.1417	5.40599
AI837181	16.8775	40.5251	74.0622	22.1724	34.813	32.5739
AI846148	0.945866	3.35936	11.5719	6.22662	6.10021	7.9693
AI848100	2.66243	1.16866	1.07008	24.0228	10.4892	11.6634
AI854703	0.0302131	0.307724	8.39802	0.377216	4.42228	3.90089
AI987944	1.97185	1.25023	0.708336	3.13917	1.18787	2.49675
Aicda	0	0.0227713	0	0	0	0
Aida	0	0	0	0	0	0
Aif1	7.12229	1.83621	3.40806	2.70305	1.54566	4.9648
Aif1l	0.0833169	1.91275	3.8722	0.764948	27.5326	27.8827
Aifm1	48.6446	17.7095	10.3202	16.2053	18.8286	14.3806
Aifm2	13.3829	11.1754	9.09661	2.89506	2.6002	4.00977
Aifm3	2.9414	0.0701475	25.8302	11.4931	9.64177	5.4403
Aig1	10.781	5.6525	34.8786	59.3062	25.6301	32.6223
Aim1	3.68793	0.599665	0.418873	1.94379	0.390498	0.693362
Aim1l	0.148964	0.0755548	0.0458714	0.170976	0.0135507	0
Aim2	0.107773	0.187511	0.120002	0.280385	0.0461035	0.274559
Aimp1	31.7759	99.7383	45.8865	21.4856	23.4752	23.3502
Aimp2	18.397	230.671	87.4472	15.8216	23.2483	29.1171
Aip	21.6077	95.1116	120.615	30.0432	62.49	70.7127
Aipl1	0	0.0437259	0.08001	0.121766	0	0
Aire	0	0	0	0.0432329	0	0.0400215
Airn	0	4.06173	3.1142	1.95174	2.72176	0.726813
Ajap1	0.0342173	0.0800026	15.4327	0.104027	0.337862	0.283361
AK010878	3.52587	6.79074	8.46163	7.56008	3.88286	5.386
Ak1	0.162175	871.005	292.644	211.365	63.8309	57.4129
AK129341	0.00967795	0.0115591	1.26518	21.1665	4.05679	3.31326
Ak2	199.944	38.7419	29.2356	17.673	18.2501	17.1941
Ak3	142.216	37.997	38.1572	25.696	39.8767	39.6207
Ak4	34.0749	0.893637	11.4942	1.57956	1.14405	1.2434
Ak5	0	0.216577	34.0146	0.309154	31.5881	26.0644
Ak7	0.0416894	0.0166224	0.694917	5.00368	0.169151	0.0928482
Ak8	0	0.120613	1.45521	8.74797	1.02737	0.754947
Akap1	29.5677	18.9226	16.406	12.7087	6.60193	6.37334
Akap10	3.05975	2.15732	4.56861	10.0594	14.9497	10.1126
Akap11	3.40046	1.13998	5.10267	15.4742	53.3055	44.184
Akap12	0.933727	1.97926	7.51681	13.4749	194.917	218.411
Akap13	3.78773	3.32042	1.72039	32.2116	11.8358	9.30129
Akap14	0	0	0.115111	1.51053	0.0353581	0.0647156
Akap17b	0.773503	0.359193	0.919212	13.3464	4.3604	4.31941
Akap2	1.78153	4.76339	9.50169	11.1332	18.3599	23.0373
Akap3	0	0.0176368	0.0344212	1.16883	0.0766908	0
Akap4	0	0	0	0	0	0
Akap5	0.0176478	0.00725711	2.05528	2.56994	1.44322	0.396578
Akap6	0.0197348	2.08902	9.38928	14.9065	104.574	60.5938
Akap7	1.833	2.92102	6.00246	11.1307	4.7477	5.03162
Akap8	7.0788	4.16021	8.19908	32.304	15.5192	16.6055
Akap8l	7.02586	14.3709	24.8495	28.9399	15.1747	16.3929
Akap9	2.06324	1.34908	2.47312	21.49	9.86999	7.90891
Akirin1	9.86181	15.7273	16.9863	40.1343	30.4244	39.6443
Akirin2	16.4495	28.8105	45.8463	33.0926	39.811	37.1996
Akna	0.373608	0.609476	1.06566	24.1699	1.61476	1.6642
Aknad1	0	0.0526947	0	0.135487	0	0
Akp3	0.0628854	0	0.0690623	0	0	0
Akr1a4	448.465	195.037	291.146	607.24	281.574	307.027
Akr1b10	1.34829	37.1978	24.7955	3.61458	5.29796	3.84606
Akr1b3	5.63676	132.125	53.4052	12.2212	16.4395	45.5366
Akr1b7	3.02443	14.0773	3.64103	0.0352439	0.0256356	0.0880802
Akr1b8	1.99867	2.25213	1.1608	1.27323	2.37577	2.42296
Akr1c12	103.064	0.328697	3.14296	0.293594	0	0.140851
Akr1c13	129.614	0.512228	3.01715	2.64109	0.0525909	0.528746
Akr1c14	241.249	0.440326	5.75683	0.823388	0.874961	1.06139
Akr1c18	0.35504	0.049444	0.523932	0.863354	0.00185006	0
Akr1c19	129.202	0.319873	2.71689	0	0	0.242953
Akr1c20	38.8932	0	0.531262	0.000653635	0	0
Akr1c21	0.000147185	0	0	0.0353931	0	0.128635
Akr1c6	798.132	0.159915	17.3399	0.000613435	0	0
Akr1d1	43.57	0	0.70915	0.0171123	0	0
Akr1e1	19.9436	10.8589	9.0112	6.32484	4.20845	7.3959
Akr7a5	170.141	32.4463	31.4181	13.5366	9.58682	10.0864
Akt1	32.4905	37.9253	94.4032	48.1275	69.1195	91.109
Akt1s1	34.3134	113.523	69.4158	17.1782	19.1507	17.2582
Akt2	51.8352	179.199	91.6017	43.3684	25.7653	26.6028
Akt3	0.470252	2.37277	8.63713	20.6784	62.0007	51.2631
Aktip	6.8102	30.3213	46.04	38.387	62.2392	70.1587
Alad	123.975	20.9185	34.0665	86.6215	40.5531	41.1948
Alas1	259.873	43.4852	40.357	108.313	17.6887	20.8937
Alas2	47.8752	8.02183	4.77733	7.16586	14.1146	13.5108
Alb	0	3.47174	978.339	0.0197422	0.0298898	0.732296
Alcam	8.85146	0.331524	11.0705	12.425	53.0576	40.5618
Aldh16a1	39.377	5.88722	6.09991	6.614	3.70767	3.74404
Aldh18a1	2.77945	2.58965	9.42524	11.3473	8.07537	8.86124
Aldh1a1	801.837	69.1947	69.5437	138.029	11.1906	24.3155
Aldh1a2	0.0429272	1.04348	6.17498	42.711	4.07782	3.54057
Aldh1a3	0.22525	0.942057	0.380196	12.8013	2.88602	0.874183
Aldh1a7	113.864	3.15941	3.18119	45.1475	2.07303	1.73004
Aldh1b1	19.6882	0.287004	4.38029	0.527164	1.71591	1.56603
Aldh1l1	440.217	4.6826	38.7295	17.4162	6.20675	4.67645
Aldh1l2	0.424675	0.969683	0.759706	1.39366	1.76008	0.94266
Aldh2	1309.37	102.418	128.943	469.933	72.9485	81.2467
Aldh3a1	0.102143	0.942391	1.24731	26.3978	0.090422	0.410879
Aldh3a2	116.707	6.22703	18.58	42.9541	26.0848	33.5045
Aldh3b1	3.56494	2.01287	4.41762	26.2891	6.00178	9.89069
Aldh3b2	0.00712379	1.26952	1.31676	2.31489	0.050326	0.142439
Aldh4a1	130.176	58.2721	28.2079	30.5618	9.27472	10.4512
Aldh5a1	13.1291	1.88768	13.1524	6.82531	4.10567	4.49614
Aldh6a1	143.006	47.0357	24.0338	47.4136	25.4778	22.2472
Aldh7a1	195.593	15.6277	41.6813	20.4269	15.153	23.1108
Aldh8a1	167.594	0.0243065	3.49695	0.089006	0.0279823	0.0478134
Aldh9a1	87.2694	3.37893	14.968	12.5511	16.2336	21.3922
Aldoa	125.782	19770.1	6497.56	273.462	726.983	805.548
Aldoart1	0.407242	68.2392	30.0783	0.50239	1.08158	1.18031
Aldoart2	0.518607	93.3805	31.4356	0.221543	0.515377	0.215198
Aldob	5195.62	0.632018	117.567	0.0934134	0.0336503	0.121563
Aldoc	7.56173	1.61649	1128.4	66.0599	114.342	89.2004
Alg1	14.8452	10.6793	20.0454	18.648	11.2838	12.107
Alg10b	6.09654	4.76996	5.25258	22.5396	13.0781	12.1428
Alg11	4.50634	3.96763	1.73717	17.3973	13.0521	10.9866
Alg12	4.12634	2.48424	8.5162	11.5916	7.3659	7.21664
Alg13	1.64199	1.51753	1.27581	5.33877	2.72658	2.99526
Alg14	18.6906	12.091	15.4153	13.6309	21.5604	20.4981
Alg2	7.12901	6.06936	46.4194	25.6651	46.4062	39.8477
Alg3	21.8973	15.4849	18.169	17.8695	15.5317	13.7575
Alg5	30.8025	12.4225	9.59515	17.7864	10.1439	12.114
Alg6	1.88153	1.72366	1.22969	6.0731	3.52578	2.98706
Alg8	6.32826	1.94296	4.01117	5.27229	1.91042	3.75252
Alg9	8.58188	5.70521	10.1864	16.7694	8.00866	8.41192
Alk	0	0.00984284	1.73562	0.192367	0.646926	0.8117
Alkbh1	1.13219	1.8183	1.81265	4.32958	1.79939	2.25312
Alkbh2	6.72464	1.52187	3.98297	2.26781	3.00862	4.21168
Alkbh3	16.219	33.4324	12.5138	12.3049	19.7637	15.3147
Alkbh4	1.18468	1.89463	3.67058	2.173	2.74814	1.87528
Alkbh5	17.8804	25.136	16.0321	32.5848	20.2643	21.7816
Alkbh6	12.4555	20.4323	54.1246	20.9173	18.2975	19.4706
Alkbh7	14.7178	25.83	34.5943	10.8759	11.0934	13.0434
Alkbh8	1.01227	1.86515	1.8002	6.0032	4.63484	5.74698
Allc	0	0	0	0	0	0
Alms1	0.19637	0.0583254	0.629118	26.8214	2.61718	1.02081
Alox12	0.365658	0.962806	0.466277	4.40311	0.39838	0.599851
Alox12b	0.0232094	0.507867	3.00647	0	0.513041	0.305953
Alox12e	0	0.0536039	0.200791	4.3184	0.294623	0
Alox15	0.062582	0.125153	0	26.6562	0.202197	0.601261
Alox5	0.103056	0.626116	0.599325	1.83847	0.412789	0.877399
Alox5ap	4.71164	7.3495	8.51657	6.22293	3.6285	9.09543
Alox8	0	0	1.25422	0.0347113	0.265953	0.17303
Aloxe3	0	0.122036	1.75146	0.216108	0.0838202	0.187913
Alpi	0.0446002	0	0	0	0	0
Alpk1	0.270808	0.0758686	0.236067	1.19895	1.51823	1.82025
Alpk2	0	7.35236	2.1591	0.00483895	0.16797	0.232177
Alpk3	0	32.4564	7.82334	0.005761	0.10233	0.94288
Alpl	13.6406	4.69505	7.86295	35.2886	5.00069	5.53406
Alppl2	0	0	0	0.0947135	0	0
Als2	13.0714	5.14619	10.2738	6.09854	12.2466	12.7109
Als2cl	5.06087	2.08118	2.99952	1.87281	0.624932	0.695148
Als2cr11	0	0	0	0.0206682	0.0303242	0.0771174
Als2cr12	0.0738662	0.117042	0.061286	0	0.13243	0.858454
Als2cr4	1.58055	2.83555	12.0433	21.4809	9.98893	15.1629
Alx1	0	0.0210755	0.0454737	5.52286	0	0
Alx3	0	0	0.261081	5.5288	0.211633	0.0510542
Alx4	0.00958505	0.149159	0.73356	4.34917	0.3937	0.115035
Amac1	0.0415738	0	0.476993	0.8695	0.283814	0.729068
Amacr	51.7989	10.7462	9.02388	3.90619	3.70491	5.74301
Ambn	0	0	0	0.30396	0	0
Ambp	2721.83	0.15695	60.7878	0.334092	0	0
Ambra1	6.45605	5.65673	19.6507	18.093	16.477	12.6801
Amd1	8.22939	110.423	9.13944	0.0820773	0.0248845	0.055331
Amd2	3.34322	27.7423	35.1807	11.2736	10.2668	10.4824
Amdhd1	95.89	0	1.9342	0.018431	0	0
Amdhd2	21.2751	7.95671	12.1647	6.14651	6.43754	7.6553
Amelx	0	0	0	1.12363	0	0.145173
Amfr	110.325	81.7854	81.9016	95.298	73.9546	71.4807
Amh	0.0787981	0.0438524	0.94707	0.238801	0.274473	0.36074
Amhr2	0.265079	4.69784	1.97779	0.144891	0.278752	0.0462792
Amica1	0.127287	0.154873	0.180271	0.600324	0.93725	0.523748
Amigo1	2.55129	10.5263	25.5992	19.3936	50.5418	38.2403
[truncated: 19,500 more rows]
